# Supplementary material for: Sedation AND Weaning In Children (SANDWICH): protocol for a cluster randomised stepped wedge trial
Source: PubMed Central journal article supplement (PMC6858098; doi:10.1136/bmjopen-2019-031630), 2019-11-10
Supplement: bmjopen-2019-031630.draft_revisions.pdf [file bmjopen-2019-031630.draft_revisions.pdf]

# BMJ Open

BMJ Open is committed to open peer review. As part of this commitment we make the peer review history of every article we publish publicly available.

When an article is published we post the peer reviewers' comments and the authors' responses online. We also post the versions of the paper that were used during peer review. These are the versions that the peer review comments apply to.

The versions of the paper that follow are the versions that were submitted during the peer review process. They are not the versions of record or the final published versions. They should not be cited or distributed as the published version of this manuscript.

BMJ Open is an open access journal and the full, final, typeset and author-corrected version of record of the manuscript is available on our site with no access controls, subscription charges or pay-per-view fees (<http://bmjopen.bmj.com>).

If you have any questions on BMJ Open's open peer review process please email [info.bmjopen@bmj.com](mailto:info.bmjopen@bmj.com)

# BMJ Open

## Sedation AND Weaning In Children (SANDWICH): protocol for a cluster randomised stepped wedge trial.

|                               |                                                                                                                                                                                                                                                                                                                                                                                                                                                                                                                                                                                                                                                                                                                                                                                                                                                                                                                                                                                                                                                                                                                                                                                                                                                                                                                                                                                                                                                                                                                                                                                                                                                                                                                                                                                                                         |
|-------------------------------|-------------------------------------------------------------------------------------------------------------------------------------------------------------------------------------------------------------------------------------------------------------------------------------------------------------------------------------------------------------------------------------------------------------------------------------------------------------------------------------------------------------------------------------------------------------------------------------------------------------------------------------------------------------------------------------------------------------------------------------------------------------------------------------------------------------------------------------------------------------------------------------------------------------------------------------------------------------------------------------------------------------------------------------------------------------------------------------------------------------------------------------------------------------------------------------------------------------------------------------------------------------------------------------------------------------------------------------------------------------------------------------------------------------------------------------------------------------------------------------------------------------------------------------------------------------------------------------------------------------------------------------------------------------------------------------------------------------------------------------------------------------------------------------------------------------------------|
| Journal:                      | <i>BMJ Open</i>                                                                                                                                                                                                                                                                                                                                                                                                                                                                                                                                                                                                                                                                                                                                                                                                                                                                                                                                                                                                                                                                                                                                                                                                                                                                                                                                                                                                                                                                                                                                                                                                                                                                                                                                                                                                         |
| Manuscript ID                 | bmjopen-2019-031630                                                                                                                                                                                                                                                                                                                                                                                                                                                                                                                                                                                                                                                                                                                                                                                                                                                                                                                                                                                                                                                                                                                                                                                                                                                                                                                                                                                                                                                                                                                                                                                                                                                                                                                                                                                                     |
| Article Type:                 | Protocol                                                                                                                                                                                                                                                                                                                                                                                                                                                                                                                                                                                                                                                                                                                                                                                                                                                                                                                                                                                                                                                                                                                                                                                                                                                                                                                                                                                                                                                                                                                                                                                                                                                                                                                                                                                                                |
| Date Submitted by the Author: | 13-May-2019                                                                                                                                                                                                                                                                                                                                                                                                                                                                                                                                                                                                                                                                                                                                                                                                                                                                                                                                                                                                                                                                                                                                                                                                                                                                                                                                                                                                                                                                                                                                                                                                                                                                                                                                                                                                             |
| Complete List of Authors:     | <p>Blackwood, Bronagh; Queen's University Belfast<br/>         Agus, Ashley; Northern Ireland Clinical Trials Unit<br/>         Boyle, Roisin; Northern Ireland Clinical Trials Unit<br/>         Clarke, Mike; Queen's University Belfast, Centre for Public Health, Institute of Clinical Sciences<br/>         Hemming, Karla; University of Birmingham, Public Health, Epidemiology and Biostatistics, Institute of Applied Health Research, College of Medical and Dental Sciences<br/>         Jordan, Joanne; Queen's University Belfast, 1Wellcome-Wolfson Institute for Experimental Medicine, School of Medicine, Dentistry and Biomedical Sciences<br/>         Macrae, Duncan; Royal Brompton Hospital, Paediatric Intensive Care Unit<br/>         McAuley, Daniel; Queen's University Belfast, Wellcome-Wolfson Institute for Experimental Medicine, School of Medicine, Dentistry and Biomedical Sciences<br/>         McDowell, Clíona; Northern Ireland Clinical Trials Unit<br/>         McIlmurray, Lisa; Queen's University Belfast, Wellcome-Wolfson Institute for Experimental Medicine, School of Medicine, Dentistry and Biomedical Sciences<br/>         Morris, Kevin; Birmingham Women's and Children's Hospital, Paediatric Intensive Care Unit<br/>         Murray, Margaret; Northern Ireland Clinical Trials Unit<br/>         Parslow, Roger; University of Leeds, Faculty of Medicine and Health<br/>         Peters, Mark; Great Ormond Street Hospital For Children NHS Trust, Paediatric Intensive Care Unit; University College London, Institute of Child Health<br/>         Tume, Lyvonne N.; University of the West of England Bristol,<br/>         Walsh, Tim; The University of Edinburgh, MRC Centre for Inflammation Research, The Queen's Medical Research Institute</p> |
| Keywords:                     | Clinical trial, intensive care, paediatric, stepped wedge, ventilator weaning                                                                                                                                                                                                                                                                                                                                                                                                                                                                                                                                                                                                                                                                                                                                                                                                                                                                                                                                                                                                                                                                                                                                                                                                                                                                                                                                                                                                                                                                                                                                                                                                                                                                                                                                           |

SCHOLARONE™  
Manuscripts

**TITLE**

Sedation AND Weaning In CHildren (SANDWICH): protocol for a cluster randomised stepped wedge trial.

**AUTHORS**

Bronagh Blackwood, Chief Investigator<sup>1</sup>

Ashley Agus, Health Economist<sup>2</sup>

Roisin Boyle, Trial Manager<sup>2</sup>

Mike Clarke, Director of Northern Ireland Methodology Hub<sup>3</sup>

Karla Hemming, Senior Lecturer in Statistics<sup>4</sup>

Joanne Jordan, Senior Research Fellow<sup>1</sup>

Duncan Macrae, Consultant in Paediatric Intensive Care Medicine<sup>5</sup>

Daniel F McAuley, Professor in Intensive Care Medicine<sup>1</sup>

Cliona McDowell, Senior Statistician<sup>2</sup>

Lisa McIlmurray, Implementation Manager<sup>1</sup>

Kevin P Morris, Professor of Paediatric Critical Care Medicine<sup>6</sup>

Mags Murray, Trial Coordinator<sup>2</sup>

Roger Parslow, Senior Lecturer in Epidemiology<sup>7</sup>

Mark J Peters, Professor of Paediatric Intensive Care Medicine<sup>8</sup>

Lyvonne N Tume, Associate Professor in Child Health<sup>9</sup>

Timothy Walsh, Professor of Intensive Care Medicine<sup>10</sup>

on behalf of the Paediatric Intensive Care Society Study Group (PICS-SG)

<sup>1</sup>Wellcome-Wolfson Institute for Experimental Medicine, School of Medicine, Dentistry and Biomedical Sciences, Queen's University Belfast, 97 Lisburn Road, Belfast BT9 7BL, UK

<sup>2</sup>Northern Ireland Clinical Trials Unit (NICTU), 1st Floor Elliott Dynes Building, Royal Hospitals, Grosvenor Road, Belfast, N. Ireland, BT12 6BA, UK

<sup>3</sup>Centre for Public Health, Institute of Clinical Sciences, Block A, Royal Hospitals, Belfast BT12 6BJ, UK

<sup>4</sup>Public Health, Epidemiology and Biostatistics, Institute of Applied Health Research, College of Medical and Dental Sciences, University of Birmingham, Edgbaston, Birmingham, B15 2TT, UK

<sup>5</sup>Paediatric Intensive Care Unit, Royal Brompton Hospital, London, UK

<sup>6</sup>Paediatric Intensive Care Unit, Birmingham Women's and Children's Hospital, Steelhouse Lane, Birmingham, B4 6NH, UK

<sup>7</sup>Faculty of Medicine and Health, University of Leeds, UK

<sup>8</sup>UCL, Great Ormond Street Institute of Child Health, Guilford St London, WC1E 1EH, UK

<sup>9</sup>Faculty of Health and Applied Sciences, University of the West of England, UK

<sup>10</sup>The University of Edinburgh/MRC Centre for Inflammation Research, The Queen's Medical Research Institute, 47 Little France Crescent, Edinburgh, EH16 4TJ, UK

### Corresponding author

Professor Bronagh Blackwood

Wellcome-Wolfson Institute for Experimental Medicine, School of Medicine, Dentistry and Biomedical Sciences, Queen's University Belfast, 97 Lisburn Road, Belfast BT9 7BL, Northern Ireland

Email address: [b.blackwood@qub.ac.uk](mailto:b.blackwood@qub.ac.uk)

Telephone: +44 (0)28-9097-6379

### Keywords:

Clinical trial, intensive care, paediatric, stepped wedge, ventilator weaning

### ABSTRACT

#### Introduction

Weaning from ventilation is a complex process involving several stages that include recognition of patient readiness to begin the weaning process; steps to reduce ventilation while optimising sedation in order not to induce distress; and removing the endotracheal tube. Delay at any stage can prolong the duration of mechanical ventilation. We developed a multi-component intervention targeted at helping clinicians to safely expedite this process and minimise the harms associated with unnecessary mechanical ventilation.

#### Methods and analysis

This is a 20-month cluster-randomised stepped wedge clinical and cost-effectiveness trial with an internal pilot and a process evaluation. It is being conducted in 18 paediatric intensive care units in the UK to evaluate a protocol-based intervention for reducing the duration of invasive mechanical ventilation. Following an initial eight-week baseline data collection period in all sites, one site will be randomly chosen to transition to the intervention every four weeks and will start an eight-week training period after which it will continue the intervention for the remaining duration of the study. We aim to recruit approximately 10,000 patients. The primary analysis will compare data from before the training (control) with that from after the training (intervention) in each site. Full details of the analyses will be in the statistical analysis plan.

#### Ethics and dissemination

This Protocol was reviewed and approved by NRES Committee East Midlands - Nottingham 1 Research Ethics Committee (reference: 17/EM/0301). All sites started patient recruitment on 5 February 2018 before randomisation in April 2018. Results will be disseminated in 2020. The results

1  
2  
3 will be presented at national and international conferences and published in peer reviewed medical  
4 journals.  
5

### 6 **Trial Registration**

7  
8 <https://doi.org/10.1186/ISRCTN16998143> Registered on 8 March 2018 (before randomisation of the  
9 sites).  
10

## 11 **ARTICLE SUMMARY**

### 12 **Strengths and limitations**

- 13 • SANDWICH is the first large multicentre pragmatic randomised trial (approximately 10,000  
14 children) evaluating a collaborative sedation and weaning protocol aimed at reducing the  
15 duration of invasive mechanical ventilation in critically ill children.
- 16 • From inception, SANDWICH has had strong involvement from medical and nursing staff,  
17 parents and patients, and a children's research advisory group.
- 18 • The trial has an embedded cost-effectiveness and process evaluation.
- 19 • The primary outcome is patient relevant and was proposed by parents and children during  
20 feasibility work.  
21  
22  
23  
24  
25  
26  
27  
28

## 29 **INTRODUCTION**

30  
31 On average more than 20,000 children are admitted to paediatric intensive care units (PICUs) in the  
32 United Kingdom and 65% of admissions to PICU require invasive mechanical ventilation (IMV) for  
33 acute respiratory failure. [1] Weaning and extubation from IMV is a key step in the child's recovery  
34 and indicates progression towards PICU discharge. Deferments in weaning impact on patient  
35 morbidity prolong PICU stay and bed availability.  
36

37  
38 Currently, there is no consensus on the optimal weaning approach from IMV in PICUs. Our feasibility  
39 study highlighted considerable variation in ventilator weaning practice: usually a slow reduction in  
40 ventilator support to a very low level prior to extubation and no test of early readiness for  
41 extubation on higher levels of support using a trial of spontaneous breathing.[2] Furthermore,  
42 nurses' roles are not optimally utilised to adjust ventilator settings due to lack of protocols to guide  
43 ventilator weaning and discontinuation.[3] In many PICUs, very few nurses are engaged in weaning,  
44 most PICUs suspend changes to ventilator settings overnight and weaning only happens during the  
45 day.[2]  
46  
47

48 Weaning from ventilation involves: i) recognition that the child is ready to begin the weaning  
49 process; ii) steps to reduce ventilation while optimising sedation in order not to induce distress; and  
50 iii) removing the endotracheal tube. Delay at any stage can prolong the duration of IMV, therefore  
51 an intervention targeted at helping clinicians to expedite this process safely should reduce the harms  
52 associated with IMV. However, the judgement and experience of clinicians is critical in guiding  
53 weaning from ventilation, as our feasibility study showed, there is wide variation in sedation and  
54 ventilator weaning practices, junior staff are rarely involved in the process, and use of weaning  
55 protocols is rare.[2]  
56  
57

58 A Cochrane review of weaning protocols in mechanically ventilated children highlighted only three  
59 randomised trials.[4] A two-centre trial (n=260), using an intervention incorporating daily screening  
60

1  
2  
3 and a spontaneous breathing trial (SBT), demonstrated a significant reduction of 32 hours (95% CI 8  
4 to 56 hours) in duration of IMV without additional harms.[5] The smaller pilot studies using  
5 computer-driven protocols showed non-significant effects on duration of IMV, but significant  
6 reductions in weaning times (106 hours, 95% CI 28 to 184; and 21 hours, 95% CI 9 to 32).[6, 7] A  
7 recent paediatric multi-centre cluster randomised trial in the United States (n=31 sites) evaluated a  
8 sedation weaning protocol that included a SBT and found no significant reduction in duration of  
9 IMV.[8] However, the main focus of this intervention was the stringent sedative regime (targeted  
10 sedation, arousal assessments, sedation adjustment every 8 hours, and sedation weaning). In adults,  
11 a Cochrane review of protocolised weaning (17 trials) showed a 26% reduction in duration of IMV in  
12 favour of protocols and the most commonly used protocol was daily screening and SBT.[9] Although  
13 results from adults cannot be applied directly to the paediatric population, the use of SBT as a  
14 weaning strategy shows promise and the paediatric systematic review indicates clinical uncertainty  
15 that is worthy of further evaluation.  
16  
17  
18

19  
20 Various intensive care unit studies have reported associations between rates of high inter-  
21 professional collaboration and lower patient mortality;[10, 11] and improved clinician-to-clinician  
22 communication with reductions in length of stay.[12] A team-led approach that improves  
23 engagement of all staff in early recognition of readiness and preparation for weaning ventilation has  
24 the potential to reduce duration of IMV and PICU length of stay and relieve pressures for beds. As  
25 65% of nurses employed in UK PICU are Band 5 (junior) nurses, this would greatly increase the  
26 nursing contribution to the weaning process.[1] Our feasibility study identified very few policies that  
27 specifically addressed sedation and weaning guidelines and staff interviews confirmed that a  
28 strategy for weaning sedation and ventilation was an important priority in most PICUs.[2] Staff also  
29 disclosed continuing uncertainty about readiness to wean, the benefits of an extubation readiness  
30 test and its potential impact on duration of IMV in the UK.  
31  
32

33  
34 The SANDWICH trial has the capacity to generate new knowledge on the intervention, its cost-  
35 effectiveness and the implementation process. First, it will be large enough to provide reliable  
36 evidence for or against a combined ventilator/sedation weaning protocol allowing clear, strong  
37 recommendations to be made on the use of this potentially low cost intervention. Second, it will  
38 determine the main organisational and process factors considered important for ensuring the  
39 intervention is optimally implemented in PICU.  
40  
41  
42

## 43 **METHODS**

### 44 **Aim and objectives**

45  
46  
47 The SANDWICH trial will evaluate the clinical and cost-effectiveness of a protocol-based intervention  
48 incorporating co-ordinated care in managing sedation and weaning ventilation in reducing the  
49 duration of IMV in children in PICU. Specific objectives are to determine if the intervention:

- 51 • Reduces the duration of IMV in children irrespective of their expected ventilation duration  
52 (short or prolonged)
- 53 • Reduces length of PICU and hospital stay
- 54 • Does not cause additional harm as assessed through review of adverse events and respiratory  
55 complications
- 56 • Is cost effective in the NHS
- 57 • Is sustainable and acceptable to staff delivering care
- 58
- 59
- 60

1  
2  
3 A process evaluation (PE) conducted alongside the trial will explore the processes involved in  
4 delivering the intervention, in order to identify factors and the mechanisms of their interaction that  
5 may impact on trial outcomes.  
6  
7  
8

## 9 **Study design and setting**

### 10 *Setting*

11  
12 SANDWICH is a cluster-randomised stepped wedge trial in 18 NHS PICUs. Participating PICUs provide  
13 clinical audit data to the Paediatric Intensive Care Audit Network (PICANet) database  
14 (www.picanet.org.uk). PICUs will be eligible if they agree to nominate local champions; comply with  
15 the protocolised weaning intervention; and staff document a willingness to participate in training.  
16  
17

### 18 *Design*

19  
20 The stepped wedge design involves sequential randomised rollout of the intervention over 4-week  
21 time periods, (see Figure 1). Randomisation will be conducted at the hospital site (cluster) level. In  
22 general, there is one PICU per site. In sites where two PICUs will be participating, the pair will be  
23 randomised to cross from control to intervention together to avoid intervention contamination  
24 within the site. This trial requires that all participating PICUs begin the control phase of the trial  
25 when the data collection period begins. There will be an initial 8-week period of baseline data  
26 collection during which the PICU will not be exposed to the intervention. Subsequently, every 4  
27 weeks, one site will be randomly selected to transition to the intervention and start an 8-week  
28 training period during which the intervention will be rolled out. The PICU can neither be assumed to  
29 be exposed or not exposed during training so in these 8-week periods no patients will be recruited.  
30 Once a PICU crosses over to the intervention it will remain exposed to the intervention for the  
31 remaining duration of the study. After the last PICU has crossed over and has fully transitioned to  
32 the intervention, there will be a final 8-week period during which all PICUs will be fully exposed.  
33  
34  
35  
36

### 37 *Randomisation*

38  
39 The study statistician will conduct the randomisation. Each PICU will be allocated a unique ID. At  
40 study commencement, sites will be classified on size based on the number of children receiving IMV  
41 in the PICU recorded in the 2017 PICANet database. Randomisation will be balanced on cluster size  
42 such that clusters will be randomised in blocks of size 4, with each block containing 2 large and 2  
43 small clusters.  
44

### 45 *Internal pilot study*

46  
47 An internal pilot in the first four sites randomised to the intervention will evaluate and report progress  
48 during the period from randomisation to training, during training, and in the 8-week period after  
49 implementing the intervention. Specifically, the following criteria will be monitored:  
50

- 51 • Actual patient numbers/month of eligible children against predictions
- 52 • Feasibility of data collection procedures
- 53 • Percentage of parents opting out from allowing collection of their child's data
- 54 • Delivery of training (target >80% of staff/unit trained by the end of the pilot period)
- 55 • Adherence to intervention components (target >75% by the end of the pilot period).
- 56  
57

### 58 *Timeline*

1  
2  
3 The total study duration will be 36 months to include 9 months for start-up, 20 months for the trial,  
4 and 7 months for close down.  
5

## 6 7 **Intervention**

8  
9 The SANDWICH intervention comprises four components:

- 10 • Greater inter-professional collaboration at ward rounds including review of: COMFORT  
11 scores, sedative regimen and setting targets; and ventilation and setting ventilation goals
  - 12 • Sedation measurement using the COMFORT tool
  - 13 • Regular daily assessment of criteria for readiness to perform a SBT by bedside nursing staff
  - 14 • A SBT and if no distress, a discussion about the decision to extubate
- 15  
16  
17  
18

19 The intervention training will be delivered at sites by an Implementation Manager who will train the  
20 trainers (local champions, principal investigators and study-specific research nurses). Training will  
21 include an online course and face-to-face instruction. A full description of the intervention will  
22 be available in the study-specific training manual that will only be provided to PICUs during and after the  
23 training period to avoid influencing practice during the control phase.  
24  
25  
26

## 27 **Patients**

28  
29 All patients admitted to participating PICUs will be screened against the eligibility criteria.

### 30 *Inclusion criteria*

- 31 • All children (<16 years) receiving IMV.

### 32 *Exclusion criteria*

- 33 • Children not expected to reach the primary endpoint (tracheostomy *in situ*; not expected to  
34 survive; treatment withdrawal).
  - 35 • Children who are pregnant, as documented in their medical notes.
- 36  
37  
38  
39  
40  
41

### 42 *Consent*

43 A non-confirmed deemed consent (opt-out) approach will be taken in this trial. On patient  
44 admission, leaflets will be provided to parents or legal representatives informing them that the PICU  
45 is involved in a study and that staff will collect anonymised patient-level information. Leaflets will  
46 include contact details for more information or to request that their child's data is not included in  
47 the analysis. Individual patient consent will not be confirmed with parents. This deemed consent  
48 approach is in line with guidance from the Ottawa Statement,[13] feedback from proposed guidance  
49 on consent in cluster trials from the NHS Health Research Authority,[14] and was considered  
50 appropriate by parents and children during our feasibility work.[15] Posters will be displayed in  
51 prominent areas to explain that a trial is taking place in the PICU.  
52  
53  
54

### 55 *Patient withdrawal*

56  
57 Children may be withdrawn from data collection on the request of parents or legal representatives. If  
58 parents opt-out from the study before data have been collected, this will be noted on the screening  
59 log which will be held at the PICU. Following enrolment, if children are withdrawn, withdrawal will be  
60



1  
2  
3 recorded in the patient record and on PICANet. Data collected up to the point of withdrawal will not  
4 be included in the analysis.  
5  
6  
7

## 8 **Outcomes**

### 9 *Primary outcome*

10  
11 The duration of IMV measured in hours from initiation of IMV (or admission if already intubated)  
12 until the first successful extubation (defined as still breathing spontaneously 48 hours following  
13 extubation).  
14  
15

### 16 *Secondary outcomes*

- 17
- 18 • Incidence of successful extubation (defined as breathing spontaneously 48 hours following
- 19 extubation)
- 20 • Number of unplanned extubations (defined as dislodgement of the endotracheal tube from
- 21 the trachea, without the intention to extubate immediately)
- 22
- 23 • Number of reintubations
- 24 • Total duration of IMV
- 25 • Incidence and duration of post-extubation use of non-invasive ventilation
- 26 • Tracheostomy insertion
- 27 • Post-extubation stridor
- 28 • Adverse events
- 29 • PICU length of stay from admission to discharge (in days)
- 30 • Hospital length of stay from admission to discharge (in days)
- 31 • Mortality occurring within the ICU
- 32 • Mortality occurring within the hospital
- 33 • Cost per complication avoided at 28 days
- 34
- 35
- 36

37 Outcomes will be measured from patient admission up to 90 days or discharge (whichever is earlier).  
38 At the end of the 20-month enrolment period, data collection will continue for a maximum of 28 days.  
39  
40  
41

## 42 **Data collection**

43  
44 The trial will collaborate with PICANet to make best use of the data collection infrastructure which  
45 exists in PICUs in the UK. Participating PICUs routinely submit clinical data to PICANet to monitor  
46 activity and performance. PICUs have full access to, and ownership of the data. Data are validated on  
47 entry and centrally on the PICANet server. PICANet produce a download facility that allows  
48 participating PICUs to extract data required for SANDWICH, thus reducing the burden of data  
49 collection for research staff.  
50

51  
52 When submitting individual patient data to PICANet, research staff will indicate enrolled patients by  
53 adding a unique trial number. PICANet has implemented a facility to allow research staff in each  
54 PICU to download a pseudoanonymised dataset of their data for checking and upload to the  
55 SANDWICH Clinical Trials Unit (CTU) as required. This data download will not include patient  
56 identifiable information. Trial data will be transmitted from participating PICUs to the CTU  
57 electronically using a secure method.  
58  
59  
60

Outcome and compliance data that are not captured by PICANet will be collected and recorded on an electronic case report form (CRF) by PICU research staff and will not include patient identifiable information.

Table 1 shows the patient data collection schedule. The following data are collected:

- Patient characteristics (eligibility, study number, intubation date/time, socio-demographics)
- Ventilator parameters (mode of IMV, Fraction of Inspired Oxygen, Positive End Expiratory Pressure [PEEP], Peak Inspiratory Pressure, ventilator rate, tidal volume, and the level of pressure support above PEEP)
- Paediatric Critical Care Minimum Dataset
- Adverse events
- SANDWICH intervention data (readiness to wean criteria, COMFORT, ward round targets)
- Study outcomes
- Post-PICU discharge (hospital length of stay, destination post discharge, hospital mortality).

## ANALYSIS

### Clinical evaluation

Baseline characteristics will be summarised by exposure and non-exposure to the intervention using summary statistics. PICUs will be classified as being exposed to the intervention upon completion of the training period. The primary aim is to evaluate whether there is a difference in the duration of hours on ventilation before and after exposure to the intervention. We will use survival analysis (time to extubation) and estimate a hazard ratio for the intervention effect. This means that higher hazard ratios will signify success of the intervention.

We will know exact survival times (i.e. times until successful extubation) for most children, but children who die on ventilation, are transferred to another unit, are not weaned before transitioning to the training phase, or are not weaned by 90 days will not have a known extubation time. We will treat such events as censored observations, making the assumption that children who are censored for any of these reasons will have an extubation time (i.e. were or would have been removed from ventilation) greater than the time until they died or were transferred. These are plausible assumptions. In order to minimise any potential within cluster contamination, we will censor children when their PICU moves into the transition phase. When the PICU moves into the intervention phase, only new admissions will be included.

We will explore various models, but anticipate fitting a Cox proportional hazards model, perhaps with some treatment-by-covariate interaction to incorporate any non-proportionality. Allowance will be made for clustering using a frailty term for each PICU (this is similar to a random effect in a mixed effects model). We will also adjust for calendar time, since the intervention is sequentially rolled-out. If a child is re-admitted or transferred, they will be treated as new events and acknowledged within our analysis. Our primary estimate of the treatment effect will be a cluster and time adjusted hazard ratio along with 95% confidence intervals (CIs). Time adjustment is essential because this is a stepped wedge trial.

Secondary analysis will adjust for individual and cluster level covariates (such as the adherence score) and these will be pre-specified. Null hypotheses and analyses for secondary outcomes take a similar form to that for the primary outcome. Where outcomes are not survival times, analysis will

1  
2  
3 use the generalized linear mixed model, reporting risk differences for binary outcomes and mean  
4 differences for continuous outcomes (all adjusting for cluster and time effects).  
5

6 Full details of the analyses will be given in the statistical analysis plan.  
7  
8  
9

## 10 **Economic evaluation**

11  
12 A cost-effectiveness analysis will be performed from the perspective of the hospital to estimate the  
13 cost per complication avoided at 28 days. The occurrence of respiratory complications at 28 days will  
14 be measured.  
15

16 We will estimate total hospital costs until 28 days for each participant by applying appropriate unit  
17 costs from the NHS Schedule of Reference Costs [16] to resource use data collected prospectively via  
18 the CRF or PICANet, as appropriate. Data on PICU resource use will be obtained via PICANet through  
19 the routine collection of the Paediatric Critical Care Minimum Data Set (PCCMDS). The PCCMDS  
20 consists of items recorded for each PICU bed-day that can be used to define the level of care and  
21 appropriate healthcare resource group (HRG). For patients discharged from hospital before 28 days,  
22 data on any PICU readmissions within 28 days will come from PICANet but data on readmissions to  
23 general hospital wards will not be collected. This is expected to lead to only minimal data loss, as the  
24 readmission rate within 30 days in a similar paediatric population was low (5%), with a mean  
25 hospital length of stay of less than 1 day.[17]  
26  
27  
28

29 We will summarise hospital service use, costs and respiratory complications using descriptive  
30 statistics. Multilevel mixed-effects regression modelling will be used for total costs and respiratory  
31 complications. We will adjust for calendar time and clustering, ensuring consistency with the other  
32 models being constructed as part of the main analysis. We will estimate adjusted incremental  
33 (differential) total costs and adjusted incremental effects (respiratory complications). Standard  
34 methods will be used to explore and display uncertainty in the cost-effectiveness data including  
35 scatterplots on the cost-effectiveness plane and cost-effectiveness acceptability curves. Since there  
36 is no generally accepted threshold value for cost per respiratory complication avoided, a range of  
37 plausible thresholds will be explored. Sensitivity analysis will assess the robustness of the cost-  
38 effectiveness results to changes in key parameters. Since the time horizon of the analysis is less than  
39 1 year, it will not be necessary to discount costs and effects.  
40  
41  
42  
43  
44

## 45 **PROCESS EVALUATION (PE)**

### 46 **Aim and objectives**

47  
48 The PE will explore the processes involved in delivering the intervention. The specific objectives are:  
49

- 50 • To establish the extent to which the intervention is implemented as intended (implementation  
51 fidelity), over time and across different PICU.
- 52 • To ascertain how PICU staff understand and respond to the intervention, over time and across  
53 different PICU.
- 54 • To explore the context over time and across different PICU and determine factors (including  
55 managerial, economic, organisational and work level) that affect implementation.  
56  
57  
58

### 59 **Data collection methods**

60

1  
2  
3 The methods used for the PE will be:  
4

- 5 • Initial site visits to obtain information on context and usual practice collected through  
6 interviews and/or focus groups with staff involved in the implementation and delivery of the  
7 intervention, using purposive sampling to obtain a range of participants according to grade  
8 and profession.
- 9 • Telephone interviews with research staff and local champions in the intervention phase to  
10 obtain information regarding the implementation process, acceptability of the intervention,  
11 barriers and clinical decisions affecting the use of the intervention.
- 12 • Final site visits to undertake individual and/or focus group interviews with a purposive sample  
13 of staff involved in implementation or intervention delivery. Interviews will explore clinician  
14 understanding and experiences, including those relating to barriers and facilitators to the  
15 delivery and receipt of the intervention.  
16  
17  
18

### 19 **Data analysis methods**

20  
21 Data from the PE will be analysed using the framework approach.[18] A sample of textual data will be  
22 reviewed and double-coded by another independent member of the research team to ensure  
23 confirmability and trustworthiness. The integration of process and trial outcome data and subsequent  
24 analyses will be secondary and explanatory, and separate from the primary effectiveness analysis. The  
25 qualitative evidence will be systematically combined with outcome data to identify the processes  
26 mediating protocol implementation, receipt and setting and observed outcomes.  
27  
28  
29

### 30 **SAMPLE SIZE**

31  
32 The primary aim of this study is to determine whether the intervention can reduce the average  
33 number of hours on ventilation in eligible children. To inform the power calculation we used PICU  
34 admissions data for the years 2014 to 2016 from units participating in the trial to determine  
35 parameters to inform the sample size calculation. The expected sample size is 9520 based on an  
36 average cluster size of 28 patients per 4-week block. In this trial, duration of ventilation is censored  
37 at the point of transitioning from the control to the training period, discharge to another hospital, at  
38 90-days, death, and receiving a tracheostomy so applying censoring to this dataset provided us with  
39 a homogeneous population that more accurately reflected the trial population. The mean duration  
40 of mechanical ventilation was 5.8 (SD 9.6) days and an ICC of 0.005 (95% CI: 0.001 to 0.01). It is  
41 postulated that a reduction of one day on ventilation is both clinically important and achievable.  
42 Whilst our primary analysis will be a survival analysis, no methodology currently exists to determine  
43 power in a stepped wedge trial for this outcome type. We therefore determined the power available  
44 assuming a continuous outcome. This is expected to be a conservative approach meaning that it  
45 should have slightly underestimated the power not having allowed for the time to event nature of  
46 the data.  
47  
48  
49

50  
51 The cluster sample size app (<https://clusterrcts.shinyapps.io/rshinyapp>) was used to update the  
52 sample size calculation given this information. Using this app and for the actual design of the trial  
53 (using the actual information on the number of clusters and number of steps and using the following  
54 assumptions: no. clusters per sequence=1, ICC=0.005 (with consideration across the range 0.001 to  
55 0.01), an exchangeable correlation structure, mean difference=1, SD=9.6, at 5% significance level,  
56 the power is approximately 80% for a cluster size of 28 (Figure 2).  
57  
58  
59  
60

## **PATIENT AND PUBLIC INVOLVEMENT**

We undertook consultation interviews with parents, a 15-year old PICU survivor and 13 young people who were members of the NIHR Clinical Research Network: Children, Young Person's Advisory Group about the proposed trial. Their views have contributed to the choice of patient relevant outcomes and informed the approach to consent. The consultation work was funded by the Northern Ireland Health and Social Care Research and Development Division and aided by Jenny Preston, Consumer Liaison Manager for the NIHR-Children Research Network. We secured patient and young people's continued involvement to provide advice on study design, implementation, parent and child information leaflets, assistance with preparation of educational materials and dissemination of findings. Father and son, Lewis and Archie Veale (now 18-years), agreed to be on the Trial Steering Group for this study. They have first-hand experience of the difficulties of ventilator weaning (Archie spent 8 weeks in PICU in 2014).

## **ETHICS, OVERSIGHT AND DISSEMINATION**

### **Ethics**

The Protocol (and amendments) received ethical approval from NRES Committee East Midlands - Nottingham 1 REC (7/EM/0301).

### **Oversight**

The Northern Ireland CTU (NICTU) will manage the trial. The Trial Management Group (TMG), chaired by the Chief Investigator, will meet monthly and have responsibility for the day-to-day operational management of the trial. The Trial Steering Committee (TSC) will meet approximately every 6 to 12 months and provide oversight for the conduct of the study on behalf of the Funder (National Institute for Health Research) and Sponsor (Queen's University Belfast). The Data Monitoring Committee (DMC) will meet approximately every 6 to 12 months, and will safeguard the rights, safety and wellbeing of trial participants; monitor data and make recommendations to the TSC on whether there are any safety reasons why the trial should not continue; and monitor overall study conduct to ensure validity and integrity of the study findings.

### **Dissemination**

We will publish findings from this study in a timely and relevant manner to influence health service policy to deliver public benefit. Our dissemination strategy targets a variety of service users including: i) the UK paediatric intensive care community (trial updates at the PICS Study Group meetings); ii) the wider paediatric intensive care community (presentations at national and international meetings; publications in high quality peer-reviewed open access journals); iii) the public via a final report in the NIHR HTA journal and national parent support and liaison groups, via social media and through the PICS Families group; and iv) NHS managers and commissioners if the study supports a change of practice.

## **TRIAL STATUS**

1  
2  
3 This paper presents the protocol (version 5, 12 March 2019). The trial began on 5 February 2018. At  
4 the time of first manuscript submission, data collection for the trial was ongoing and due to be  
5 complete in October 2019. The trial results will be disseminated in 2020 through presentations at  
6 national and international conferences and publication in peer reviewed medical journals.  
7  
8  
9

## 10 **DATA STATEMENT**

11  
12 The data generated and/or analysed during the SANDWICH trial are not yet publicly available due to  
13 the ongoing nature of the trial. When the trial is complete, datasets will be available from the chief  
14 investigator on reasonable request and arrangements will be made to deposit them in a suitable  
15 online repository.  
16  
17  
18  
19

## 20 **ACKNOWLEDGMENTS**

21 We thank the following people for their contributions to the set-up and delivery of the SANDWICH  
22 trial: Lynn Murphy, NICTU Manager, Pauline Bradley, Data Manager, Gerard O'Hanlon Data Manager  
23 and Ruth Holman, Clinical Trial Administrator; and Dr Katherine Fielding and Professor Gavin Perkins  
24 for agreeing to chair the TSC and DMC, respectively. We thank the Paediatric Intensive Care Society  
25 – Study Group for their ongoing advice and support of this trial. We also thank the research and  
26 clinical staff from the 17 participating sites:  
27  
28  
29

- 30 1. Alder Hey Children's Hospital, Liverpool
  - 31 2. Royal Belfast Hospital for Sick Children, Belfast
  - 32 3. Birmingham Children's Hospital, Birmingham
  - 33 4. Bristol Royal Children's Hospital, Bristol
  - 34 5. Royal Brompton Hospital, London
  - 35 6. Addenbrooke's Hospital, Cambridge
  - 36 7. Noah's Ark Children's Hospital for Wales, Cardiff
  - 37 8. Great Ormond Street Hospital, London
  - 38 9. Variety Children's Hospital, King's College London
  - 39 10. Leeds General Infirmary, Leeds
  - 40 11. Royal Victoria Infirmary, Newcastle
  - 41 12. John Radcliffe Hospital, Oxford
  - 42 13. Southampton General Hospital, Southampton
  - 43 14. St George's Hospital, London
  - 44 15. St Mary's Hospital, London
  - 45 16. Royal Stoke University Hospital, Stoke-on-Trent
  - 46 17. Sheffield Children's Hospital, Sheffield
- 47  
48  
49  
50  
51  
52

## 53 **AUTHOR CONTRIBUTIONS**

54 BB, AA, MC, KH, JJ, DM, DFMcA, CMcD, KM, RP, MP, LT, and TW conceived the SANDWICH trial. BB  
55 led the grant application and, as Chief Investigator, has oversight for the trial. KH and CMcD have  
56 oversight for the statistical analysis; AA has oversight for the economic analysis; LMcl and TW  
57 designed the online training materials; JJ designed and conducts the process evaluation. BB drafted  
58 this manuscript and all authors contributed to, read and approved the final version.  
59  
60

## FUNDING AND SPONSORSHIP

This project was funded by the National Institute for Health Research (NIHR) Health Technology Assessment (HTA) Programme (project number: HTA - 15/104/01).[19] Queen's University Belfast is the sponsor for the trial. The views and opinions expressed therein are those of the authors and do not necessarily reflect those of the HTA Programme, NIHR, NHS, the Department of Health nor the sponsor.

## COMPETING INTERESTS

None declared.

## Figure Legends

Figure 1. SANDWICH study flowchart

Figure 2. Power Curve

## REFERENCES

1. Paediatric Intensive Care Audit Network Annual Report 2017 (published November 2017): Universities of Leeds and Leicester. [https://www.picanet.org.uk/wp-content/uploads/sites/25/2019/01/PICANet\\_2017\\_Annual\\_Report\\_Tables\\_and\\_Figures\\_FINAL\\_v2.0-compressed.pdf](https://www.picanet.org.uk/wp-content/uploads/sites/25/2019/01/PICANet_2017_Annual_Report_Tables_and_Figures_FINAL_v2.0-compressed.pdf) (Accessed 29 April 2019)
2. Blackwood B and Tume L. The implausibility of 'usual care' in an open system: sedation and weaning practices in Paediatric Intensive Care Units (PICUs) in the United Kingdom (UK). *Trials*. 2015; 16: 325.
3. Blackwood B, Junk C, Lyons J, McAuley DF and Rose L. Roles responsibilities in mechanical ventilation and weaning in pediatric intensive care units: a national survey. *Am J Crit Care*. 2013; 22: 189-97.
4. Blackwood B, Murray M, Chisakuta A, Cardwell CR and O'Halloran P. Protocolized versus non-protocolized weaning for reducing the duration of invasive mechanical ventilation in critically ill paediatric patients. *Cochrane Database Syst Rev*. 2013; 7: CD009082.
5. Foronda FK, Troster EJ, Farias JA, Barbas CS, Ferraro AA, Faria LS, et al. The impact of daily evaluation and spontaneous breathing test on the duration of pediatric mechanical ventilation: a randomized controlled trial. *Crit Care Med*. 2011; 39(11): 2526-33.
6. Juvet PA, Payen V, Gauvin F, Emeriaud G, Lacroix J. Weaning children from mechanical ventilation with a computer-driven protocol: a pilot trial. *Intensive Care Med*. 2013; 39(5): 919-25.
7. Maloney C. Computerized weaning of childhood respiratory failure: University of Utah; 2007.



- 1  
2  
3 8. Curley MA, Wypij D, Watson RS, Grant MJ, Asaro LA, Cheifetz IM, et al. Protocolized sedation vs  
4 usual care in pediatric patients mechanically ventilated for acute respiratory failure: a randomized  
5 clinical trial. *JAMA*. 2015;313(4):379-89.  
6
- 7 9. Blackwood B, Burns KE, Cardwell CR and O'Halloran P. Protocolized versus non-protocolized  
8 weaning for reducing the duration of mechanical ventilation in critically ill adult patients. *Cochrane*  
9 *Database Syst Rev*. 2014; 11: CD006904.  
10
- 11 10. Knaus WA, Draper EA, Wagner DP and Zimmerman JE. An evaluation of outcome from intensive  
12 care in major medical centres. *Ann Intern Med*. 1986; 104: 410-8.  
13
- 14 11. Wheelan S, Burchill C and Tilin F. The link between teamwork and patients' outcomes in intensive  
15 care units. *Am J Crit Care*. 2003; 12: 527-34.  
16
- 17 12. Pronovost P, Needham D, Berenholtz S, et al. An intervention to decrease catheter-related  
18 bloodstream infections in the ICU. *N Engl J Med*. 2006; 355: 2725-32.  
19
- 20 13. Weijer C, Grimshaw JM, Eccles MP, et al. The Ottawa Statement on the Ethical Design and  
21 Conduct of Cluster Randomized Trials. *PLoS Med*. 2012; 9: e1001346.  
22
- 23 14. Health Research Authority. Summary of Responses – Seeking informed consent in simple and  
24 efficient trials. 2015 [accessed 26-06-2017 from <http://www.hra.nhs.uk/consent-simple-trials/>].  
25
- 26 15. Tume LN, Preston J and Blackwood B. Parents' and young people's involvement in designing a  
27 trial of ventilator weaning. *Nurs Crit Care*. 2016; 21(3): e10-8.  
28
- 29 16. Department of Health. NHS Reference Costs 2015–16. London: Department Of Health, London.  
30 <https://www.gov.uk/government/publications/nhs-reference-costs-2015-to-2016> (Accessed 29 April  
31 2019)  
32
- 33 17. Macrae D, Grieve R, Allen E, Sadique Z, Betts H, Morris K, Pappachan VJ, Parslow R, Tasker RC,  
34 Baines P, Broadhead M, Duthie ML, Fortune PM, Inwald D, McMaster P, Peters MJ, Schindler M,  
35 Guerriero C, Piercy D, Slavik Z, Snowdon C, Van Dyck L and Elbourne D. A clinical and economic  
36 evaluation of Control of Hyperglycaemia in Paediatric intensive care (CHiP): a randomised controlled  
37 trial. *Health Technol Assess*. 2014; 18(26): 1-210. doi: 10.3310/hta18260.  
38
- 39 18. Carroll C, Patterson M, Wood S, Booth A, Rick J and Balain S. A conceptual framework for  
40 implementation fidelity. *Implement Sci: IS*. 2007;2:40.  
41
- 42 19. Sedation and weaning in children: the SANDWICH trial. NIHR Journals Library.  
43 <https://www.journalslibrary.nihr.ac.uk/programmes/hta/1510401/#/> (Accessed 17 April 2019)  
44  
45  
46  
47  
48  
49  
50  
51  
52  
53  
54  
55  
56  
57  
58  
59  
60



Table 1. Patient data collection schedule

|                                                                             | Baseline (at point of recruitment) | Control phase up to 90 days or PICU discharge | Intervention phase up to 90 days or PICU discharge | Post PICU discharge |
|-----------------------------------------------------------------------------|------------------------------------|-----------------------------------------------|----------------------------------------------------|---------------------|
| <b>Patient characteristics</b>                                              | √                                  |                                               |                                                    |                     |
| <b>Daily 8am ventilator parameters</b>                                      |                                    | √                                             | √                                                  |                     |
| <b>Daily PCCMD</b>                                                          |                                    | √                                             | √                                                  |                     |
| <b>Daily adverse events</b>                                                 |                                    | √                                             | √                                                  |                     |
| <b>Outcomes</b>                                                             |                                    | √                                             | √                                                  |                     |
| <b>2-hours prior to extubation, ventilator parameters and COMFORT score</b> |                                    | √                                             |                                                    |                     |
| <b>SANDWICH intervention checklist</b>                                      |                                    |                                               | √                                                  |                     |
| <b>Hospital discharge and status</b>                                        |                                    |                                               |                                                    | √                   |

*PCCMD denotes Paediatric Critical Care Minimum Dataset*

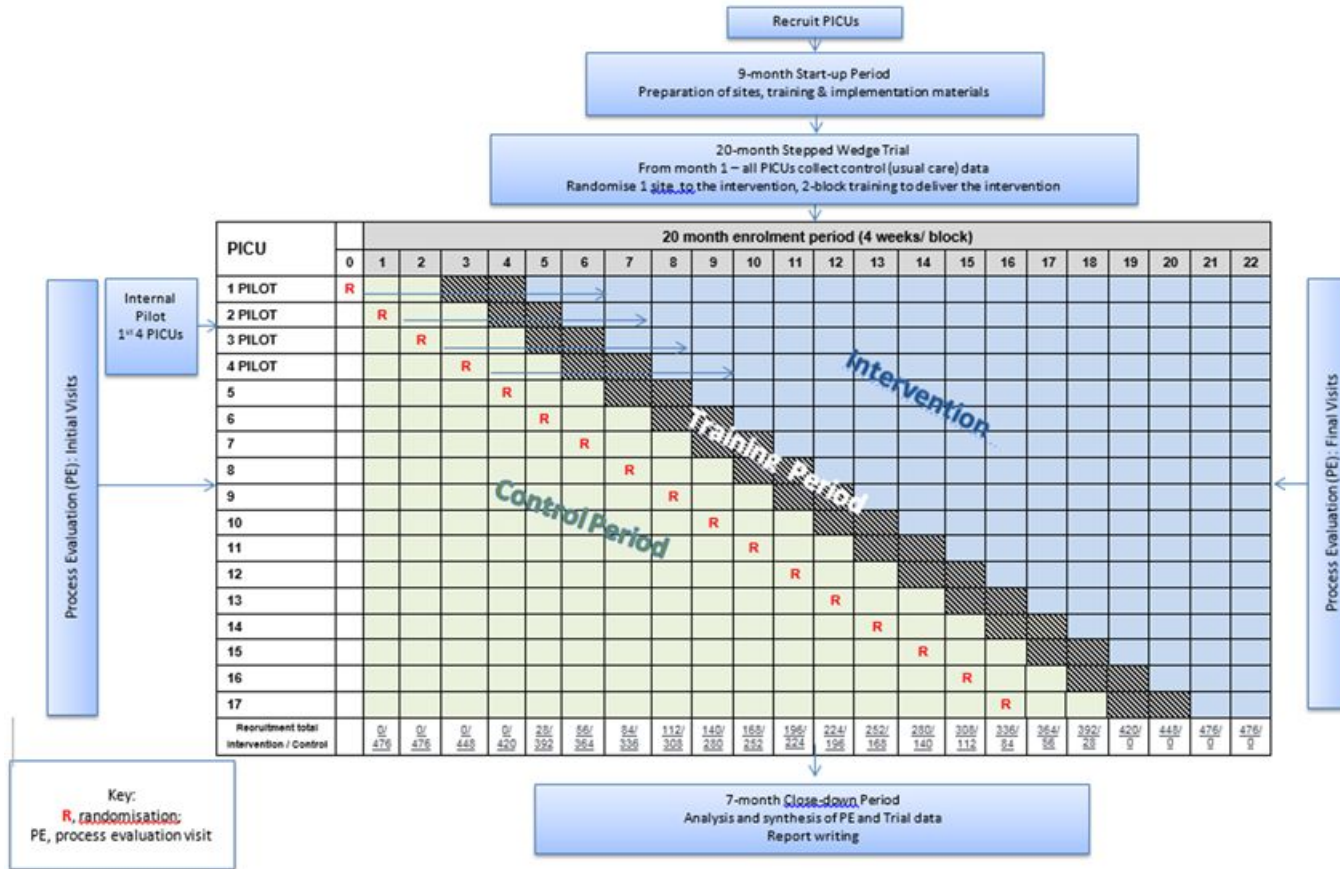

Figure 1. SANDWICH study flowchart

1  
2  
3  
4  
5  
6  
7  
8  
9  
10  
11  
12  
13  
14  
15  
16  
17  
18  
19  
20  
21  
22  
23  
24  
25  
26  
27  
28  
29  
30  
31  
32  
33  
34  
35  
36  
37  
38  
39  
40  
41  
42  
43  
44  
45  
46  
47  
48  
49  
50  
51  
52  
53  
54  
55  
56  
57  
58  
59  
60

Figure 2. Power curve

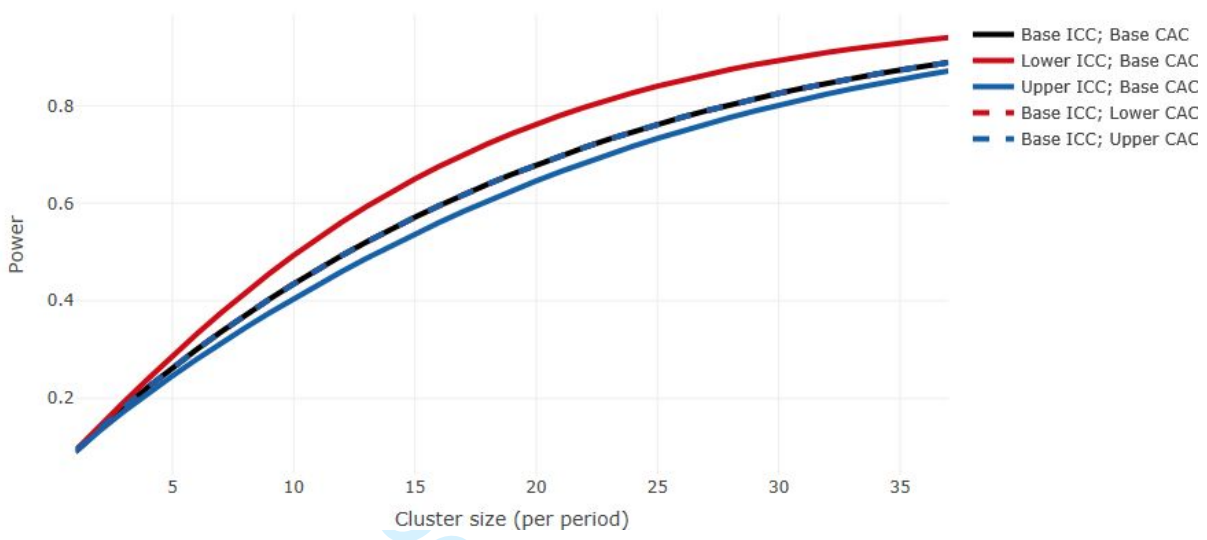

Peer review only

# Reporting checklist for protocol of a clinical trial.

Based on the SPIRIT guidelines.

## Instructions to authors

Complete this checklist by entering the page numbers from your manuscript where readers will find each of the items listed below.

Your article may not currently address all the items on the checklist. Please modify your text to include the missing information. If you are certain that an item does not apply, please write "n/a" and provide a short explanation.

Upload your completed checklist as an extra file when you submit to a journal.

In your methods section, say that you used the SPIRIT reporting guidelines, and cite them as:

Chan A-W, Tetzlaff JM, Altman DG, Laupacis A, Gøtzsche PC, Krleža-Jerić K, Hróbjartsson A, Mann H, Dickersin K, Berlin J, Doré C, Parulekar W, Summerskill W, Groves T, Schulz K, Sox H, Rockhold FW, Rennie D, Moher D. SPIRIT 2013 Statement: Defining standard protocol items for clinical trials. *Ann Intern Med.* 2013;158(3):200-207

|                                   |                     | Reporting Item                                                                                               | Page Number |
|-----------------------------------|---------------------|--------------------------------------------------------------------------------------------------------------|-------------|
| <b>Administrative information</b> |                     |                                                                                                              |             |
| Title                             | <a href="#">#1</a>  | Descriptive title identifying the study design, population, interventions, and, if applicable, trial acronym | 1           |
| Trial registration                | <a href="#">#2a</a> | Trial identifier and registry name. If not yet registered, name of intended registry                         | 3           |
| Trial registration: data set      | <a href="#">#2b</a> | All items from the World Health Organization Trial Registration Data Set                                     | -           |
| Protocol version                  | <a href="#">#3</a>  | Date and version identifier                                                                                  | 11          |
| Funding                           | <a href="#">#4</a>  | Sources and types of financial, material, and other support                                                  | 12          |

|    |                      |                     |                                                          |     |
|----|----------------------|---------------------|----------------------------------------------------------|-----|
| 1  | Roles and            | <a href="#">#5a</a> | Names, affiliations, and roles of protocol contributors  | 12  |
| 2  | responsibilities:    |                     |                                                          |     |
| 3  | contributorship      |                     |                                                          |     |
| 4  |                      |                     |                                                          |     |
| 5  |                      |                     |                                                          |     |
| 6  | Roles and            | <a href="#">#5b</a> | Name and contact information for the trial sponsor       | 12  |
| 7  | responsibilities:    |                     |                                                          |     |
| 8  | sponsor contact      |                     |                                                          |     |
| 9  | information          |                     |                                                          |     |
| 10 |                      |                     |                                                          |     |
| 11 |                      |                     |                                                          |     |
| 12 |                      |                     |                                                          |     |
| 13 | Roles and            | <a href="#">#5c</a> | Role of study sponsor and funders, if any, in study      | 12  |
| 14 | responsibilities:    |                     | design; collection, management, analysis, and            |     |
| 15 | sponsor and funder   |                     | interpretation of data; writing of the report; and the   |     |
| 16 |                      |                     | decision to submit the report for publication, including |     |
| 17 |                      |                     | whether they will have ultimate authority over any of    |     |
| 18 |                      |                     | these activities                                         |     |
| 19 |                      |                     |                                                          |     |
| 20 |                      |                     |                                                          |     |
| 21 |                      |                     |                                                          |     |
| 22 |                      |                     |                                                          |     |
| 23 | Roles and            | <a href="#">#5d</a> | Composition, roles, and responsibilities of the          | 11  |
| 24 | responsibilities:    |                     | coordinating centre, steering committee, endpoint        |     |
| 25 | committees           |                     | adjudication committee, data management team, and        |     |
| 26 |                      |                     | other individuals or groups overseeing the trial, if     |     |
| 27 |                      |                     | applicable (see Item 21a for data monitoring committee)  |     |
| 28 |                      |                     |                                                          |     |
| 29 |                      |                     |                                                          |     |
| 30 |                      |                     |                                                          |     |
| 31 | <b>Introduction</b>  |                     |                                                          |     |
| 32 |                      |                     |                                                          |     |
| 33 | Background and       | <a href="#">#6a</a> | Description of research question and justification for   | 3-4 |
| 34 | rationale            |                     | undertaking the trial, including summary of relevant     |     |
| 35 |                      |                     | studies (published and unpublished) examining benefits   |     |
| 36 |                      |                     | and harms for each intervention                          |     |
| 37 |                      |                     |                                                          |     |
| 38 |                      |                     |                                                          |     |
| 39 |                      |                     |                                                          |     |
| 40 | Background and       | <a href="#">#6b</a> | Explanation for choice of comparators                    | 3-4 |
| 41 | rationale: choice of |                     |                                                          |     |
| 42 | comparators          |                     |                                                          |     |
| 43 |                      |                     |                                                          |     |
| 44 |                      |                     |                                                          |     |
| 45 | Objectives           | <a href="#">#7</a>  | Specific objectives or hypotheses                        | 4   |
| 46 |                      |                     |                                                          |     |
| 47 |                      |                     |                                                          |     |
| 48 | Trial design         | <a href="#">#8</a>  | Description of trial design including type of trial (eg, | 5   |
| 49 |                      |                     | parallel group, crossover, factorial, single group),     |     |
| 50 |                      |                     | allocation ratio, and framework (eg, superiority,        |     |
| 51 |                      |                     | equivalence, non-inferiority, exploratory)               |     |
| 52 |                      |                     |                                                          |     |
| 53 |                      |                     |                                                          |     |
| 54 |                      |                     |                                                          |     |

**Methods:**  
**Participants,**

## interventions, and outcomes

|    |                                 |                      |                                                                                                                                                                                                                                                                                                                                                                                |
|----|---------------------------------|----------------------|--------------------------------------------------------------------------------------------------------------------------------------------------------------------------------------------------------------------------------------------------------------------------------------------------------------------------------------------------------------------------------|
| 1  |                                 |                      |                                                                                                                                                                                                                                                                                                                                                                                |
| 2  |                                 |                      |                                                                                                                                                                                                                                                                                                                                                                                |
| 3  |                                 |                      |                                                                                                                                                                                                                                                                                                                                                                                |
| 4  | Study setting                   | <a href="#">#9</a>   | Description of study settings (eg, community clinic, academic hospital) and list of countries where data will be collected. Reference to where list of study sites can be obtained                                                                                                                                                                                             |
| 5  |                                 |                      | 5                                                                                                                                                                                                                                                                                                                                                                              |
| 6  |                                 |                      |                                                                                                                                                                                                                                                                                                                                                                                |
| 7  |                                 |                      |                                                                                                                                                                                                                                                                                                                                                                                |
| 8  |                                 |                      |                                                                                                                                                                                                                                                                                                                                                                                |
| 9  |                                 |                      |                                                                                                                                                                                                                                                                                                                                                                                |
| 10 | Eligibility criteria            | <a href="#">#10</a>  | Inclusion and exclusion criteria for participants. If applicable, eligibility criteria for study centres and individuals who will perform the interventions (eg, surgeons, psychotherapists)                                                                                                                                                                                   |
| 11 |                                 |                      | 6                                                                                                                                                                                                                                                                                                                                                                              |
| 12 |                                 |                      |                                                                                                                                                                                                                                                                                                                                                                                |
| 13 |                                 |                      |                                                                                                                                                                                                                                                                                                                                                                                |
| 14 |                                 |                      |                                                                                                                                                                                                                                                                                                                                                                                |
| 15 |                                 |                      |                                                                                                                                                                                                                                                                                                                                                                                |
| 16 |                                 |                      |                                                                                                                                                                                                                                                                                                                                                                                |
| 17 | Interventions: description      | <a href="#">#11a</a> | Interventions for each group with sufficient detail to allow replication, including how and when they will be administered                                                                                                                                                                                                                                                     |
| 18 |                                 |                      | 6                                                                                                                                                                                                                                                                                                                                                                              |
| 19 |                                 |                      |                                                                                                                                                                                                                                                                                                                                                                                |
| 20 |                                 |                      |                                                                                                                                                                                                                                                                                                                                                                                |
| 21 |                                 |                      |                                                                                                                                                                                                                                                                                                                                                                                |
| 22 |                                 |                      |                                                                                                                                                                                                                                                                                                                                                                                |
| 23 | Interventions: modifications    | <a href="#">#11b</a> | Criteria for discontinuing or modifying allocated interventions for a given trial participant (eg, drug dose change in response to harms, participant request, or improving / worsening disease)                                                                                                                                                                               |
| 24 |                                 |                      | N/A                                                                                                                                                                                                                                                                                                                                                                            |
| 25 |                                 |                      |                                                                                                                                                                                                                                                                                                                                                                                |
| 26 |                                 |                      |                                                                                                                                                                                                                                                                                                                                                                                |
| 27 |                                 |                      |                                                                                                                                                                                                                                                                                                                                                                                |
| 28 |                                 |                      |                                                                                                                                                                                                                                                                                                                                                                                |
| 29 |                                 |                      |                                                                                                                                                                                                                                                                                                                                                                                |
| 30 | Interventions: adherence        | <a href="#">#11c</a> | Strategies to improve adherence to intervention protocols, and any procedures for monitoring adherence (eg, drug tablet return; laboratory tests)                                                                                                                                                                                                                              |
| 31 |                                 |                      | 9-10                                                                                                                                                                                                                                                                                                                                                                           |
| 32 |                                 |                      |                                                                                                                                                                                                                                                                                                                                                                                |
| 33 |                                 |                      |                                                                                                                                                                                                                                                                                                                                                                                |
| 34 |                                 |                      |                                                                                                                                                                                                                                                                                                                                                                                |
| 35 | Interventions: concomitant care | <a href="#">#11d</a> | Relevant concomitant care and interventions that are permitted or prohibited during the trial                                                                                                                                                                                                                                                                                  |
| 36 |                                 |                      | N/A                                                                                                                                                                                                                                                                                                                                                                            |
| 37 |                                 |                      |                                                                                                                                                                                                                                                                                                                                                                                |
| 38 |                                 |                      |                                                                                                                                                                                                                                                                                                                                                                                |
| 39 | Outcomes                        | <a href="#">#12</a>  | Primary, secondary, and other outcomes, including the specific measurement variable (eg, systolic blood pressure), analysis metric (eg, change from baseline, final value, time to event), method of aggregation (eg, median, proportion), and time point for each outcome. Explanation of the clinical relevance of chosen efficacy and harm outcomes is strongly recommended |
| 40 |                                 |                      | 7                                                                                                                                                                                                                                                                                                                                                                              |
| 41 |                                 |                      |                                                                                                                                                                                                                                                                                                                                                                                |
| 42 |                                 |                      |                                                                                                                                                                                                                                                                                                                                                                                |
| 43 |                                 |                      |                                                                                                                                                                                                                                                                                                                                                                                |
| 44 |                                 |                      |                                                                                                                                                                                                                                                                                                                                                                                |
| 45 |                                 |                      |                                                                                                                                                                                                                                                                                                                                                                                |
| 46 |                                 |                      |                                                                                                                                                                                                                                                                                                                                                                                |
| 47 |                                 |                      |                                                                                                                                                                                                                                                                                                                                                                                |
| 48 |                                 |                      |                                                                                                                                                                                                                                                                                                                                                                                |
| 49 |                                 |                      |                                                                                                                                                                                                                                                                                                                                                                                |
| 50 | Participant timeline            | <a href="#">#13</a>  | Time schedule of enrolment, interventions (including any run-ins and washouts), assessments, and visits for participants. A schematic diagram is highly recommended (see Figure)                                                                                                                                                                                               |
| 51 |                                 |                      | 8                                                                                                                                                                                                                                                                                                                                                                              |
| 52 |                                 |                      |                                                                                                                                                                                                                                                                                                                                                                                |
| 53 |                                 |                      |                                                                                                                                                                                                                                                                                                                                                                                |
| 54 |                                 |                      |                                                                                                                                                                                                                                                                                                                                                                                |
| 55 |                                 |                      |                                                                                                                                                                                                                                                                                                                                                                                |
| 56 |                                 |                      |                                                                                                                                                                                                                                                                                                                                                                                |
| 57 | Sample size                     | <a href="#">#14</a>  | Estimated number of participants needed to achieve study objectives and how it was determined, including                                                                                                                                                                                                                                                                       |
| 58 |                                 |                      | 10                                                                                                                                                                                                                                                                                                                                                                             |
| 59 |                                 |                      |                                                                                                                                                                                                                                                                                                                                                                                |
| 60 |                                 |                      |                                                                                                                                                                                                                                                                                                                                                                                |

clinical and statistical assumptions supporting any sample size calculations

Recruitment [#15](#) Strategies for achieving adequate participant enrolment to reach target sample size 6

## Methods:

### Assignment of interventions (for controlled trials)

Allocation: sequence generation [#16a](#) Method of generating the allocation sequence (eg, computer-generated random numbers), and list of any factors for stratification. To reduce predictability of a random sequence, details of any planned restriction (eg, blocking) should be provided in a separate document that is unavailable to those who enrol participants or assign interventions 5

Allocation concealment mechanism [#16b](#) Mechanism of implementing the allocation sequence (eg, central telephone; sequentially numbered, opaque, sealed envelopes), describing any steps to conceal the sequence until interventions are assigned 5

Allocation: implementation [#16c](#) Who will generate the allocation sequence, who will enrol participants, and who will assign participants to interventions 5

Blinding (masking) [#17a](#) Who will be blinded after assignment to interventions (eg, trial participants, care providers, outcome assessors, data analysts), and how N/A

Blinding (masking): emergency unblinding [#17b](#) If blinded, circumstances under which unblinding is permissible, and procedure for revealing a participant's allocated intervention during the trial N/A

### Methods: Data collection, management, and analysis

Data collection plan [#18a](#) Plans for assessment and collection of outcome, baseline, and other trial data, including any related processes to promote data quality (eg, duplicate 7-8

measurements, training of assessors) and a description of study instruments (eg, questionnaires, laboratory tests) along with their reliability and validity, if known. Reference to where data collection forms can be found, if not in the protocol

|    |                            |                      |                                                             |
|----|----------------------------|----------------------|-------------------------------------------------------------|
| 1  |                            |                      |                                                             |
| 2  |                            |                      |                                                             |
| 3  |                            |                      |                                                             |
| 4  |                            |                      |                                                             |
| 5  |                            |                      |                                                             |
| 6  |                            |                      |                                                             |
| 7  |                            |                      |                                                             |
| 8  |                            |                      |                                                             |
| 9  | Data collection plan:      | <a href="#">#18b</a> | Plans to promote participant retention and complete         |
| 10 | retention                  |                      | follow-up, including list of any outcome data to be         |
| 11 |                            |                      | collected for participants who discontinue or deviate from  |
| 12 |                            |                      | intervention protocols                                      |
| 13 |                            |                      |                                                             |
| 14 |                            |                      |                                                             |
| 15 | Data management            | <a href="#">#19</a>  | Plans for data entry, coding, security, and storage,        |
| 16 |                            |                      | including any related processes to promote data quality     |
| 17 |                            |                      | (eg, double data entry; range checks for data values).      |
| 18 |                            |                      | Reference to where details of data management               |
| 19 |                            |                      | procedures can be found, if not in the protocol             |
| 20 |                            |                      |                                                             |
| 21 |                            |                      |                                                             |
| 22 |                            |                      |                                                             |
| 23 | Statistics: outcomes       | <a href="#">#20a</a> | Statistical methods for analysing primary and secondary     |
| 24 |                            |                      | outcomes. Reference to where other details of the           |
| 25 |                            |                      | statistical analysis plan can be found, if not in the       |
| 26 |                            |                      | protocol                                                    |
| 27 |                            |                      |                                                             |
| 28 |                            |                      |                                                             |
| 29 |                            |                      |                                                             |
| 30 | Statistics: additional     | <a href="#">#20b</a> | Methods for any additional analyses (eg, subgroup and       |
| 31 | analyses                   |                      | adjusted analyses)                                          |
| 32 |                            |                      |                                                             |
| 33 |                            |                      |                                                             |
| 34 | Statistics: analysis       | <a href="#">#20c</a> | Definition of analysis population relating to protocol non- |
| 35 | population and             |                      | adherence (eg, as randomised analysis), and any             |
| 36 | missing data               |                      | statistical methods to handle missing data (eg, multiple    |
| 37 |                            |                      | imputation)                                                 |
| 38 |                            |                      |                                                             |
| 39 |                            |                      |                                                             |
| 40 |                            |                      |                                                             |
| 41 | <b>Methods: Monitoring</b> |                      |                                                             |
| 42 |                            |                      |                                                             |
| 43 | Data monitoring:           | <a href="#">#21a</a> | Composition of data monitoring committee (DMC);             |
| 44 | formal committee           |                      | summary of its role and reporting structure; statement of   |
| 45 |                            |                      | whether it is independent from the sponsor and              |
| 46 |                            |                      | competing interests; and reference to where further         |
| 47 |                            |                      | details about its charter can be found, if not in the       |
| 48 |                            |                      | protocol. Alternatively, an explanation of why a DMC is     |
| 49 |                            |                      | not needed                                                  |
| 50 |                            |                      |                                                             |
| 51 |                            |                      |                                                             |
| 52 |                            |                      |                                                             |
| 53 |                            |                      |                                                             |
| 54 | Data monitoring:           | <a href="#">#21b</a> | Description of any interim analyses and stopping            |
| 55 | interim analysis           |                      | guidelines, including who will have access to these         |
| 56 |                            |                      |                                                             |
| 57 |                            |                      |                                                             |
| 58 |                            |                      |                                                             |
| 59 |                            |                      |                                                             |
| 60 |                            |                      |                                                             |



|    |                      |                                                                              |     |
|----|----------------------|------------------------------------------------------------------------------|-----|
| 1  |                      | interim results and make the final decision to terminate                     |     |
| 2  |                      | the trial                                                                    |     |
| 3  |                      |                                                                              |     |
| 4  | Harms                | <a href="#">#22</a> Plans for collecting, assessing, reporting, and managing | 11  |
| 5  |                      | solicited and spontaneously reported adverse events                          |     |
| 6  |                      | and other unintended effects of trial interventions or trial                 |     |
| 7  |                      | conduct                                                                      |     |
| 8  |                      |                                                                              |     |
| 9  |                      |                                                                              |     |
| 10 |                      |                                                                              |     |
| 11 | Auditing             | <a href="#">#23</a> Frequency and procedures for auditing trial conduct, if  | N/A |
| 12 |                      | any, and whether the process will be independent from                        |     |
| 13 |                      | investigators and the sponsor                                                |     |
| 14 |                      |                                                                              |     |
| 15 |                      |                                                                              |     |
| 16 | <b>Ethics and</b>    |                                                                              |     |
| 17 | <b>dissemination</b> |                                                                              |     |
| 18 |                      |                                                                              |     |
| 19 |                      |                                                                              |     |
| 20 | Research ethics      | <a href="#">#24</a> Plans for seeking research ethics committee /            | 11  |
| 21 | approval             | institutional review board (REC / IRB) approval                              |     |
| 22 |                      |                                                                              |     |
| 23 |                      |                                                                              |     |
| 24 | Protocol amendments  | <a href="#">#25</a> Plans for communicating important protocol               | 11  |
| 25 |                      | modifications (eg, changes to eligibility criteria,                          |     |
| 26 |                      | outcomes, analyses) to relevant parties (eg,                                 |     |
| 27 |                      | investigators, REC / IRBs, trial participants, trial                         |     |
| 28 |                      | registries, journals, regulators)                                            |     |
| 29 |                      |                                                                              |     |
| 30 |                      |                                                                              |     |
| 31 |                      |                                                                              |     |
| 32 | Consent or assent    | <a href="#">#26a</a> Who will obtain informed consent or assent from         | N/A |
| 33 |                      | potential trial participants or authorised surrogates, and                   |     |
| 34 |                      | how (see Item 32)                                                            |     |
| 35 |                      |                                                                              |     |
| 36 |                      |                                                                              |     |
| 37 | Consent or assent:   | <a href="#">#26b</a> Additional consent provisions for collection and use of | N/A |
| 38 | ancillary studies    | participant data and biological specimens in ancillary                       |     |
| 39 |                      | studies, if applicable                                                       |     |
| 40 |                      |                                                                              |     |
| 41 |                      |                                                                              |     |
| 42 |                      |                                                                              |     |
| 43 | Confidentiality      | <a href="#">#27</a> How personal information about potential and enrolled    | 11  |
| 44 |                      | participants will be collected, shared, and maintained in                    |     |
| 45 |                      | order to protect confidentiality before, during, and after                   |     |
| 46 |                      | the trial                                                                    |     |
| 47 |                      |                                                                              |     |
| 48 |                      |                                                                              |     |
| 49 | Declaration of       | <a href="#">#28</a> Financial and other competing interests for principal    | 12  |
| 50 | interests            | investigators for the overall trial and each study site                      |     |
| 51 |                      |                                                                              |     |
| 52 |                      |                                                                              |     |
| 53 | Data access          | <a href="#">#29</a> Statement of who will have access to the final trial     | 11  |
| 54 |                      | dataset, and disclosure of contractual agreements that                       |     |
| 55 |                      | limit such access for investigators                                          |     |
| 56 |                      |                                                                              |     |
| 57 |                      |                                                                              |     |
| 58 |                      |                                                                              |     |
| 59 |                      |                                                                              |     |
| 60 |                      |                                                                              |     |

|    |                          |                      |                                                                |     |
|----|--------------------------|----------------------|----------------------------------------------------------------|-----|
| 1  | Ancillary and post trial | <a href="#">#30</a>  | Provisions, if any, for ancillary and post-trial care, and for | N/A |
| 2  | care                     |                      | compensation to those who suffer harm from trial               |     |
| 3  |                          |                      | participation                                                  |     |
| 4  |                          |                      |                                                                |     |
| 5  |                          |                      |                                                                |     |
| 6  | Dissemination policy:    | <a href="#">#31a</a> | Plans for investigators and sponsor to communicate trial       | 11  |
| 7  | trial results            |                      | results to participants, healthcare professionals, the         |     |
| 8  |                          |                      | public, and other relevant groups (eg, via publication,        |     |
| 9  |                          |                      | reporting in results databases, or other data sharing          |     |
| 10 |                          |                      | arrangements), including any publication restrictions          |     |
| 11 |                          |                      |                                                                |     |
| 12 |                          |                      |                                                                |     |
| 13 |                          |                      |                                                                |     |
| 14 | Dissemination policy:    | <a href="#">#31b</a> | Authorship eligibility guidelines and any intended use of      | 11  |
| 15 | authorship               |                      | professional writers                                           |     |
| 16 |                          |                      |                                                                |     |
| 17 |                          |                      |                                                                |     |
| 18 | Dissemination policy:    | <a href="#">#31c</a> | Plans, if any, for granting public access to the full          | 11  |
| 19 | reproducible research    |                      | protocol, participant-level dataset, and statistical code      |     |
| 20 |                          |                      |                                                                |     |
| 21 |                          |                      |                                                                |     |
| 22 | <b>Appendices</b>        |                      |                                                                |     |
| 23 |                          |                      |                                                                |     |
| 24 | Informed consent         | <a href="#">#32</a>  | Model consent form and other related documentation             | N/A |
| 25 | materials                |                      | given to participants and authorised surrogates                |     |
| 26 |                          |                      |                                                                |     |
| 27 |                          |                      |                                                                |     |
| 28 | Biological specimens     | <a href="#">#33</a>  | Plans for collection, laboratory evaluation, and storage of    | N/A |
| 29 |                          |                      | biological specimens for genetic or molecular analysis in      |     |
| 30 |                          |                      | the current trial and for future use in ancillary studies, if  |     |
| 31 |                          |                      | applicable                                                     |     |
| 32 |                          |                      |                                                                |     |
| 33 |                          |                      |                                                                |     |
| 34 |                          |                      |                                                                |     |

35 None The SPIRIT checklist is distributed under the terms of the Creative Commons Attribution  
 36 License CC-BY-ND 3.0. This checklist can be completed online using <https://www.goodreports.org/>, a  
 37 tool made by the [EQUATOR Network](#) in collaboration with [Penelope.ai](#)  
 38  
 39  
 40  
 41  
 42  
 43  
 44  
 45  
 46  
 47  
 48  
 49  
 50  
 51  
 52  
 53  
 54  
 55  
 56  
 57  
 58  
 59  
 60

# BMJ Open

## Sedation AND Weaning In Children (SANDWICH): protocol for a cluster randomised stepped wedge trial.

|                                 |                                                                                                                                                                                                                                                                                                                                                                                                                                                                                                                                                                                                                                                                                                                                                                                                                                                                                                                                                                                                                                                                                                                                                                                                                                                                                                                                                                                                                                                                                                                                                                                                                                                                                                                                                                                                                         |
|---------------------------------|-------------------------------------------------------------------------------------------------------------------------------------------------------------------------------------------------------------------------------------------------------------------------------------------------------------------------------------------------------------------------------------------------------------------------------------------------------------------------------------------------------------------------------------------------------------------------------------------------------------------------------------------------------------------------------------------------------------------------------------------------------------------------------------------------------------------------------------------------------------------------------------------------------------------------------------------------------------------------------------------------------------------------------------------------------------------------------------------------------------------------------------------------------------------------------------------------------------------------------------------------------------------------------------------------------------------------------------------------------------------------------------------------------------------------------------------------------------------------------------------------------------------------------------------------------------------------------------------------------------------------------------------------------------------------------------------------------------------------------------------------------------------------------------------------------------------------|
| Journal:                        | <i>BMJ Open</i>                                                                                                                                                                                                                                                                                                                                                                                                                                                                                                                                                                                                                                                                                                                                                                                                                                                                                                                                                                                                                                                                                                                                                                                                                                                                                                                                                                                                                                                                                                                                                                                                                                                                                                                                                                                                         |
| Manuscript ID                   | bmjopen-2019-031630.R1                                                                                                                                                                                                                                                                                                                                                                                                                                                                                                                                                                                                                                                                                                                                                                                                                                                                                                                                                                                                                                                                                                                                                                                                                                                                                                                                                                                                                                                                                                                                                                                                                                                                                                                                                                                                  |
| Article Type:                   | Protocol                                                                                                                                                                                                                                                                                                                                                                                                                                                                                                                                                                                                                                                                                                                                                                                                                                                                                                                                                                                                                                                                                                                                                                                                                                                                                                                                                                                                                                                                                                                                                                                                                                                                                                                                                                                                                |
| Date Submitted by the Author:   | 03-Oct-2019                                                                                                                                                                                                                                                                                                                                                                                                                                                                                                                                                                                                                                                                                                                                                                                                                                                                                                                                                                                                                                                                                                                                                                                                                                                                                                                                                                                                                                                                                                                                                                                                                                                                                                                                                                                                             |
| Complete List of Authors:       | <p>Blackwood, Bronagh; Queen's University Belfast<br/>         Agus, Ashley; Northern Ireland Clinical Trials Unit<br/>         Boyle, Roisin; Northern Ireland Clinical Trials Unit<br/>         Clarke, Mike; Queen's University Belfast, Centre for Public Health, Institute of Clinical Sciences<br/>         Hemming, Karla; University of Birmingham, Public Health, Epidemiology and Biostatistics, Institute of Applied Health Research, College of Medical and Dental Sciences<br/>         Jordan, Joanne; Queen's University Belfast, 1Wellcome-Wolfson Institute for Experimental Medicine, School of Medicine, Dentistry and Biomedical Sciences<br/>         Macrae, Duncan; Royal Brompton Hospital, Paediatric Intensive Care Unit<br/>         McAuley, Daniel; Queen's University Belfast, Wellcome-Wolfson Institute for Experimental Medicine, School of Medicine, Dentistry and Biomedical Sciences<br/>         McDowell, Clíona; Northern Ireland Clinical Trials Unit<br/>         McIlmurray, Lisa; Queen's University Belfast, Wellcome-Wolfson Institute for Experimental Medicine, School of Medicine, Dentistry and Biomedical Sciences<br/>         Morris, Kevin; Birmingham Women's and Children's Hospital, Paediatric Intensive Care Unit<br/>         Murray, Margaret; Northern Ireland Clinical Trials Unit<br/>         Parslow, Roger; University of Leeds, Faculty of Medicine and Health<br/>         Peters, Mark; Great Ormond Street Hospital For Children NHS Trust, Paediatric Intensive Care Unit; University College London, Institute of Child Health<br/>         Tume, Lyvonne N.; University of the West of England Bristol,<br/>         Walsh, Tim; The University of Edinburgh, MRC Centre for Inflammation Research, The Queen's Medical Research Institute</p> |
| <b>Primary Subject Heading</b>: | Intensive care                                                                                                                                                                                                                                                                                                                                                                                                                                                                                                                                                                                                                                                                                                                                                                                                                                                                                                                                                                                                                                                                                                                                                                                                                                                                                                                                                                                                                                                                                                                                                                                                                                                                                                                                                                                                          |
| Secondary Subject Heading:      | Intensive care, Paediatrics                                                                                                                                                                                                                                                                                                                                                                                                                                                                                                                                                                                                                                                                                                                                                                                                                                                                                                                                                                                                                                                                                                                                                                                                                                                                                                                                                                                                                                                                                                                                                                                                                                                                                                                                                                                             |
| Keywords:                       | Clinical trial, intensive care, paediatric, stepped wedge, ventilator weaning                                                                                                                                                                                                                                                                                                                                                                                                                                                                                                                                                                                                                                                                                                                                                                                                                                                                                                                                                                                                                                                                                                                                                                                                                                                                                                                                                                                                                                                                                                                                                                                                                                                                                                                                           |
|                                 |                                                                                                                                                                                                                                                                                                                                                                                                                                                                                                                                                                                                                                                                                                                                                                                                                                                                                                                                                                                                                                                                                                                                                                                                                                                                                                                                                                                                                                                                                                                                                                                                                                                                                                                                                                                                                         |

1  
2  
3  
4  
5  
6  
7  
8  
9  
10  
11  
12  
13  
14  
15  
16  
17  
18  
19  
20  
21  
22  
23  
24  
25  
26  
27  
28  
29  
30  
31  
32  
33  
34  
35  
36  
37  
38  
39  
40  
41  
42  
43  
44  
45  
46  
47  
48  
49  
50  
51  
52  
53  
54  
55  
56  
57  
58  
59  
60

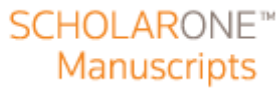

**TITLE**

Sedation AND Weaning In CHildren (SANDWICH): protocol for a cluster randomised stepped wedge trial.

**AUTHORS**

Bronagh Blackwood, Chief Investigator<sup>1</sup>

Ashley Agus, Health Economist<sup>2</sup>

Roisin Boyle, Trial Manager<sup>2</sup>

Mike Clarke, Director of Northern Ireland Methodology Hub<sup>3</sup>

Karla Hemming, Senior Lecturer in Statistics<sup>4</sup>

Joanne Jordan, Senior Research Fellow<sup>1</sup>

Duncan Macrae, Consultant in Paediatric Intensive Care Medicine<sup>5</sup>

Daniel F McAuley, Professor in Intensive Care Medicine<sup>1</sup>

Cliona McDowell, Senior Statistician<sup>2</sup>

Lisa McIlmurray, Implementation Manager<sup>1</sup>

Kevin P Morris, Professor of Paediatric Critical Care Medicine<sup>6</sup>

Margaret Murray, Trial Coordinator<sup>2</sup>

Roger Parslow, Senior Lecturer in Epidemiology<sup>7</sup>

Mark J Peters, Professor of Paediatric Intensive Care Medicine<sup>8</sup>

Lyvonne N Tume, Associate Professor in Child Health<sup>9</sup>

Tim Walsh, Professor of Intensive Care Medicine<sup>10</sup>

on behalf of the Paediatric Intensive Care Society Study Group (PICS-SG)

<sup>1</sup>Wellcome-Wolfson Institute for Experimental Medicine, School of Medicine, Dentistry and Biomedical Sciences, Queen's University Belfast, 97 Lisburn Road, Belfast BT9 7BL, UK

<sup>2</sup>Northern Ireland Clinical Trials Unit (NICTU), 1st Floor Elliott Dynes Building, Royal Hospitals, Grosvenor Road, Belfast, N. Ireland, BT12 6BA, UK

1  
2  
3 <sup>3</sup>Centre for Public Health, Institute of Clinical Sciences, Block A, Royal Hospitals, Belfast BT12 6BJ, UK

4  
5 <sup>4</sup>Public Health, Epidemiology and Biostatistics, Institute of Applied Health Research, College of  
6  
7  
8  
9  
10  
11  
12  
13  
14  
15  
16  
17  
18  
19  
20  
21  
22  
23  
24  
25  
26  
27  
28  
29  
30  
31  
32  
33  
34  
35  
36  
37  
38  
39  
40  
41  
42  
43  
44  
45  
46  
47  
48  
49  
50  
51  
52  
53  
54  
55  
56  
57  
58  
59  
60  
  
<sup>4</sup>Public Health, Epidemiology and Biostatistics, Institute of Applied Health Research, College of  
Medical and Dental Sciences, University of Birmingham, Edgbaston, Birmingham, B15 2TT, UK

<sup>5</sup>Paediatric Intensive Care Unit, Royal Brompton Hospital, London, UK

<sup>6</sup>Paediatric Intensive Care Unit, Birmingham Women's and Children's Hospital, Steelhouse Lane,  
Birmingham, B4 6NH, UK

<sup>7</sup>Faculty of Medicine and Health, University of Leeds, UK

<sup>8</sup>UCL, Great Ormond Street Institute of Child Health, Guilford St London, WC1E 1EH, UK

<sup>9</sup>Faculty of Health and Applied Sciences, University of the West of England, UK

<sup>10</sup>The University of Edinburgh/MRC Centre for Inflammation Research, The Queen's Medical  
Research Institute, 47 Little France Crescent, Edinburgh, EH16 4TJ, UK

### Corresponding author

Professor Bronagh Blackwood

Wellcome-Wolfson Institute for Experimental Medicine, School of Medicine, Dentistry and  
Biomedical Sciences, Queen's University Belfast, 97 Lisburn Road, Belfast BT9 7BL, Northern Ireland

Email address: [b.blackwood@qub.ac.uk](mailto:b.blackwood@qub.ac.uk)

Telephone: +44 (0)28-9097-6379

### Keywords:

Clinical trial, intensive care, paediatric, stepped wedge, ventilator weaning

## ABSTRACT

### Introduction

Weaning from ventilation is a complex process involving several stages that include recognition of  
patient readiness to begin the weaning process; steps to reduce ventilation while optimising  
sedation in order not to induce distress; and removing the endotracheal tube. Delay at any stage can

1  
2  
3 prolong the duration of mechanical ventilation. We developed a multi-component intervention  
4 targeted at helping clinicians to safely expedite this process and minimise the harms associated with  
5 unnecessary mechanical ventilation.  
6  
7

### 8 9 **Methods and analysis**

10  
11 This is a 20-month cluster-randomised stepped wedge clinical and cost-effectiveness trial with an  
12 internal pilot and a process evaluation. It is being conducted in 18 paediatric intensive care units in  
13 the UK to evaluate a protocol-based intervention for reducing the duration of invasive mechanical  
14 ventilation. Following an initial eight-week baseline data collection period in all sites, one site will be  
15 randomly chosen to transition to the intervention every four weeks and will start an eight-week  
16 training period after which it will continue the intervention for the remaining duration of the study.  
17  
18 We aim to recruit approximately 10,000 patients. The primary analysis will compare data from  
19 before the training (control) with that from after the training (intervention) in each site. Full details  
20 of the analyses will be in the statistical analysis plan.  
21  
22  
23  
24  
25

### 26 27 **Ethics and dissemination**

28  
29 This Protocol was reviewed and approved by NRES Committee East Midlands - Nottingham 1  
30 Research Ethics Committee (reference: 17/EM/0301). All sites started patient recruitment on 5  
31 February 2018 before randomisation in April 2018. Results will be disseminated in 2020. The results  
32 will be presented at national and international conferences and published in peer reviewed medical  
33 journals.  
34  
35  
36  
37

### 38 39 **Trial Registration**

40  
41 <https://doi.org/10.1186/ISRCTN16998143> Registered on 8 March 2018 (before randomisation of the  
42 sites).  
43  
44  
45  
46

## 47 **ARTICLE SUMMARY**

### 48 49 **Strengths and limitations**

- 50  
51
- 52 • SANDWICH is the first large multicentre pragmatic randomised trial (approximately 10,000  
53 children) evaluating a collaborative sedation and weaning protocol aimed at reducing the  
54 duration of invasive mechanical ventilation in critically ill children.
  - 55 • From inception, SANDWICH has had strong involvement from medical and nursing staff,  
56 parents and patients, and a children's research advisory group.  
57  
58  
59  
60

- The trial has an embedded cost-effectiveness and process evaluation.
- The primary outcome is patient relevant and was proposed by parents and children during feasibility work.
- A limitation may be the practicality of achieving all signed research and governance approvals to enable sites to start at the same time within the required start-up timeframe.

## INTRODUCTION

On average more than 20,000 children are admitted to paediatric intensive care units (PICUs) in the United Kingdom and 65% of admissions to PICU require invasive mechanical ventilation (IMV) for acute respiratory failure. [1] Weaning and extubation from IMV is a key step in the child's recovery and indicates progression towards PICU discharge. Deferments in weaning impact on patient morbidity prolong PICU stay and bed availability.

Currently, there is no consensus on the optimal weaning approach from IMV in PICUs. Our feasibility study highlighted considerable variation in ventilator weaning practice: usually a slow reduction in ventilator support to a very low level prior to extubation and no test of early readiness for extubation on higher levels of support using a trial of spontaneous breathing.[2] Furthermore, nurses' roles are not optimally utilised to adjust ventilator settings due to lack of protocols to guide ventilator weaning and discontinuation.[3] In many PICUs, very few nurses are engaged in weaning, most PICUs suspend changes to ventilator settings overnight and weaning only happens during the day.[2]

Weaning from ventilation involves: i) recognition that the child is ready to begin the weaning process; ii) steps to reduce ventilation while optimising sedation in order not to induce distress; and iii) removing the endotracheal tube. Delay at any stage can prolong the duration of IMV, therefore an intervention targeted at helping clinicians to expedite this process safely should reduce the harms associated with IMV. However, the judgement and experience of clinicians is critical in guiding weaning from ventilation, as our feasibility study showed, there is wide variation in sedation and ventilator weaning practices, junior staff are rarely involved in the process, and use of weaning protocols is rare.[2]

A Cochrane review of weaning protocols in mechanically ventilated children highlighted only three randomised trials.[4] A two-centre trial (n=260), using an intervention incorporating daily screening and a spontaneous breathing trial (SBT), demonstrated a significant reduction of 32 hours (95% CI 8 to 56 hours) in duration of IMV without additional harms.[5] The smaller pilot studies using



1  
2  
3 computer-driven protocols showed non-significant effects on duration of IMV, but significant  
4 reductions in weaning times (106 hours, 95% CI 28 to 184; and 21 hours, 95% CI 9 to 32).[6, 7] A  
5 recent paediatric multi-centre cluster randomised trial in the United States (n=31 sites) evaluated a  
6 sedation weaning protocol that included a SBT and found no significant reduction in duration of  
7 IMV.[8] However, the main focus of this intervention was the stringent sedative regime (targeted  
8 sedation, arousal assessments, sedation adjustment every 8 hours, and sedation weaning). In adults,  
9 a Cochrane review of protocolised weaning (17 trials) showed a 26% reduction in duration of IMV in  
10 favour of protocols and the most commonly used protocol was daily screening and SBT.[9] Although  
11 results from adults cannot be applied directly to the paediatric population, the use of SBT as a  
12 weaning strategy shows promise and the paediatric systematic review indicates clinical uncertainty  
13 that is worthy of further evaluation.  
14

15  
16 Various intensive care unit studies have reported associations between rates of high inter-  
17 professional collaboration and lower patient mortality;[10, 11] and improved clinician-to-clinician  
18 communication with reductions in length of stay.[12] A team-led approach that improves  
19 engagement of all staff in early recognition of readiness and preparation for weaning ventilation has  
20 the potential to reduce duration of IMV and PICU length of stay and relieve pressures for beds. As  
21 65% of nurses employed in UK PICU are Band 5 (junior) nurses, this would greatly increase the  
22 nursing contribution to the weaning process.[1] Our feasibility study identified very few policies that  
23 specifically addressed sedation and weaning guidelines and staff interviews confirmed that a  
24 strategy for weaning sedation and ventilation was an important priority in most PICUs.[2] Staff also  
25 disclosed continuing uncertainty about readiness to wean, the benefits of an extubation readiness  
26 test and its potential impact on duration of IMV in the UK.  
27

28  
29 The SANDWICH trial has the capacity to generate new knowledge on the intervention, its cost-  
30 effectiveness and the implementation process. First, it will be large enough to provide reliable  
31 evidence for or against a combined ventilator/sedation weaning protocol allowing clear, strong  
32 recommendations to be made on the use of this potentially low cost intervention. Second, it will  
33 determine the main organisational and process factors considered important for ensuring the  
34 intervention is optimally implemented in PICU.  
35

## 36 37 38 39 40 41 42 43 44 45 46 47 48 49 50 51 52 53 54 55 **METHODS**

### 56 57 **Aim and objectives** 58 59 60

1  
2  
3 The SANDWICH trial will evaluate the clinical and cost-effectiveness of a protocol-based intervention  
4 incorporating co-ordinated care in managing sedation and weaning ventilation in reducing the  
5 duration of IMV in children in PICU. Specific objectives are to determine if the intervention:  
6  
7

- 8 • Reduces the duration of IMV in children irrespective of their expected ventilation duration  
9 (short or prolonged)
  - 10 • Reduces length of PICU and hospital stay
  - 11 • Does not cause additional harm as assessed through review of adverse events and  
12 respiratory complications
  - 13 • Is cost effective in the NHS
  - 14 • Is sustainable and acceptable to staff delivering care
- 15  
16  
17  
18  
19  
20  
21  
22

23 A process evaluation (PE) conducted alongside the trial will explore the processes involved in  
24 delivering the intervention, in order to identify factors and the mechanisms of their interaction that  
25 may impact on trial outcomes.  
26  
27  
28  
29  
30

### 31 **Study design and setting**

#### 32 *Setting*

33 SANDWICH is a cluster-randomised stepped wedge trial in 18 NHS PICUs. Participating PICUs provide  
34 clinical audit data to the Paediatric Intensive Care Audit Network (PICANet) database  
35 (www.picanet.org.uk). PICUs will be eligible if they agree to nominate local champions; comply with  
36 the protocolised weaning intervention; and staff document a willingness to participate in training.  
37  
38  
39  
40  
41  
42

#### 43 *Design*

44 The stepped wedge design involves sequential randomised rollout of the intervention over 4-week  
45 time periods, (see Figure 1). Randomisation will be conducted at the hospital site (cluster) level. In  
46 general, there is one PICU per site. In one site there will be two PICUs participating. The site will be  
47 treated as one cluster for the purpose of randomisation and the pair will be randomised to cross  
48 from control to intervention together to avoid intervention contamination within the site. In the  
49 analysis we will treat these two PICUs as two separate clusters. This trial requires that all  
50 participating PICUs begin the control phase of the trial when the data collection period begins. There  
51 will be an initial 8-week period of baseline data collection during which the PICU will not be exposed  
52 to the intervention. Subsequently, every 4 weeks, one site will be randomly selected to transition to  
53  
54  
55  
56  
57  
58  
59  
60

1  
2  
3 the intervention and start an 8-week training period during which the intervention will be rolled out.  
4 The PICU can neither be assumed to be exposed or not exposed during training so in these 8-week  
5 periods no patients will be recruited. Once a PICU crosses over to the intervention it will remain  
6 exposed to the intervention for the remaining duration of the study. After the last PICU has crossed  
7 over and has fully transitioned to the intervention, there will be a final 8-week period during which  
8 all PICUs will be fully exposed.  
9

10  
11  
12  
13  
14 We have chosen the stepped wedge design over the conventional parallel cluster design for four  
15 main reasons. First, we have a limited number of clusters available (max. 26 PICUs in the UK, but not  
16 all likely to agree to participate). With this limited number the parallel design is infeasible as there  
17 are not sufficient clusters to allow detection of the important clinical effect. Second, feasibility work  
18 informed us that units are more likely to participate in the trial if they are guaranteed their unit will  
19 at some point receive the intervention.[2] Third, it would be infeasible and more costly to deliver the  
20 intervention simultaneously to all units randomised to the intervention in a parallel design. Less  
21 important factors in our decision process, but none-the-less benefits of this design are the ability to  
22 estimate treatment effect heterogeneity (over time and clusters) and it allows for the possibility that  
23 the intervention may be tweaked as the trial progresses. This is important as whilst the intervention  
24 will be clearly documented in accordance with TIDieR guidelines [13], an intervention that is allowed  
25 to adapt to its setting has the best chance of success. Fourth, if the intervention is found to be  
26 effective, knowledge translation will be easier as PICUs participating can potentially continue post  
27 trial maximising the benefits of any effects to the NHS and patients.  
28  
29  
30  
31  
32  
33  
34  
35  
36

### 37 38 *Randomisation*

39  
40 The study statistician will conduct the randomisation. Each PICU will be allocated a unique ID. At  
41 study commencement, sites will be classified on size based on the number of children receiving IMV  
42 in the PICU recorded in the 2017 PICANet database. Randomisation will be balanced on cluster size  
43 such that clusters will be randomised in blocks of size 4, with each block containing 2 large and 2  
44 small clusters.  
45  
46  
47  
48

### 49 50 *Internal pilot study*

51  
52 An internal pilot in the first four sites randomised to the intervention will evaluate and report  
53 progress during the period from randomisation to training, during training, and in the 8-week period  
54 after implementing the intervention. Specifically, the following criteria will be monitored:  
55

- 56 • Actual patient numbers/month of eligible children against predictions
  - 57 • Feasibility of data collection procedures
- 58  
59  
60

- Percentage of parents opting out from allowing collection of their child's data
- Delivery of training (target >80% of staff/unit trained by the end of the pilot period)
- Adherence to intervention components (target >75% by the end of the pilot period).

We will address criteria not achieved in pilot sites through offering support and further training as required. The pilot report will be shared with all sites. The report will inform any actions required in trial management and training to address the above criteria for all sites.

#### *Timeline*

The total study duration will be 36 months to include 9 months for start-up, 20 months for the trial, and 7 months for close down.

#### **Intervention**

Sedation and ventilator weaning in standard care will follow current best practice; this is currently non-protocol-based and medically-driven. Assessment and management of sedation and ventilator weaning will be according to usual practice. Sedation levels will be assessed and recorded with a validated sedation tool and ventilator weaning will involve a slow reduction in ventilator support until low levels are achieved consistent with readiness for extubation.

The SANDWICH intervention comprises four components:

- Greater inter-professional collaboration at ward rounds including review of: COMFORT scores, sedative regimen and setting targets; and ventilation and setting ventilation goals
- Sedation measurement using the COMFORT tool
- Regular daily assessment of criteria for readiness to perform a SBT by bedside nursing staff
- A SBT and if no distress, a discussion about the decision to extubate

The intervention training will be delivered at sites by an Implementation Manager who will train the trainers (local champions, principal investigators and study-specific research nurses). Training will include an online course and face-to-face instruction. A full description of the intervention was available in the study-specific training manual that was only provided to PICUs during and after the training period to avoid influencing practice during the control phase. However, at time of

1  
2  
3 publication, we are now able to release full details of the intervention which can be found at  
4 <http://www.qub.ac.uk/sites/sandwich>.  
5  
6  
7  
8

## 9 **Patients**

10 All patients admitted to participating PICUs will be screened against the eligibility criteria.

### 11 *Inclusion criteria*

- 12 • All children (<16 years) receiving IMV.

### 13 *Exclusion criteria*

- 14 • Children not expected to reach the primary endpoint (tracheostomy *in situ*; not expected to  
15 survive; treatment withdrawal).
- 16 • Children who are pregnant, as documented in their medical notes.

### 17 *Consent*

18  
19 A non-confirmed deemed consent (opt-out) approach will be taken in this trial. On patient  
20 admission, leaflets will be provided to parents or legal representatives informing them that the PICU  
21 is involved in a study and that staff will collect anonymised patient-level information. Leaflets will  
22 include contact details for more information or to request that their child's data is not included in  
23 the analysis. Individual patient consent will not be confirmed with parents. This deemed consent  
24 approach is in line with guidance from the Ottawa Statement,[14] feedback from proposed guidance  
25 on consent in cluster trials from the NHS Health Research Authority,[15] and was considered  
26 appropriate by parents and children during our feasibility work.[16] Posters will be displayed in  
27 prominent areas to explain that a trial is taking place in the PICU.  
28

### 29 *Patient withdrawal*

30 Children may be withdrawn from data collection on the request of parents or legal representatives.  
31 If parents opt-out from the study before data have been collected, this will be noted on the  
32 screening log which will be held at the PICU. Following enrolment, if children are withdrawn,  
33 withdrawal will be recorded in the patient record and on PICANet. Data collected up to the point of  
34 withdrawal will not be included in the analysis.  
35  
36  
37  
38  
39  
40  
41  
42  
43  
44  
45  
46  
47  
48  
49  
50  
51  
52  
53  
54  
55  
56  
57  
58  
59  
60

## Outcomes

### *Primary outcome*

The duration of IMV measured in hours from initiation of IMV (or admission if already intubated) until the first successful extubation (defined as still breathing spontaneously 48 hours following extubation).

### *Secondary outcomes*

- Incidence of successful extubation (defined as breathing spontaneously 48 hours following extubation)
- Number of unplanned extubations (defined as dislodgement of the endotracheal tube from the trachea, without the intention to extubate immediately)
- Number of reintubations
- Total duration of IMV
- Incidence and duration of post-extubation use of non-invasive ventilation
- Tracheostomy insertion
- Post-extubation stridor
- Adverse events (e.g. unplanned removal/dislodgement of vascular access or non-vascular catheters; bradycardia; hypoxia; cardiopulmonary resuscitation)
- PICU length of stay from admission to discharge (in days)
- Hospital length of stay from admission to discharge (in days)
- Mortality occurring within the ICU
- Mortality occurring within the hospital
- Cost per complication avoided at 28 days

Outcomes will be measured from patient admission up to 90 days or discharge (whichever is earlier). At the end of the 20-month enrolment period, data collection will continue for a maximum of 28 days.

### **Data collection**

The trial will collaborate with PICANet to make best use of the data collection infrastructure which exists in PICUs in the UK. Participating PICUs routinely submit clinical data to PICANet to monitor activity and performance. PICUs have full access to, and ownership of the data. Data are validated on

1  
2  
3 entry and centrally on the PICANet server. PICANet produce a download facility that allows  
4 participating PICUs to extract data required for SANDWICH, thus reducing the burden of data  
5 collection for research staff.  
6  
7

8  
9 When submitting individual patient data to PICANet, research staff will indicate enrolled patients by  
10 adding a unique trial number. PICANet has implemented a facility to allow research staff in each  
11 PICU to download a pseudoanonymised dataset of their data for checking and upload to the  
12 SANDWICH Clinical Trials Unit (CTU) as required. This pseudoanonymised dataset download will not  
13 include patient identifiable information. Trial data will be transmitted from participating PICUs to the  
14 CTU electronically using a secure method.  
15  
16  
17  
18

19 Outcome and compliance data that are not captured by PICANet will be collected and recorded on  
20 an electronic case report form (CRF) by PICU research staff and will not include patient identifiable  
21 information.  
22  
23  
24

25 Table 1 shows the patient data collection schedule. The following data are collected:  
26

- 27 • Patient characteristics (eligibility, study number, intubation date/time, socio-demographics)
- 28 • Ventilator parameters (mode of IMV, Fraction of Inspired Oxygen, Positive End Expiratory  
29 Pressure [PEEP], Peak Inspiratory Pressure, ventilator rate, tidal volume, and the level of  
30 pressure support above PEEP)
- 31 • Paediatric Critical Care Minimum Dataset
- 32 • Adverse events
- 33 • SANDWICH intervention data (readiness to wean criteria, COMFORT, ward round targets)
- 34 • Study outcomes
- 35 • Post-PICU discharge (hospital length of stay, destination post discharge, hospital mortality).
- 36  
37  
38  
39  
40  
41  
42  
43  
44  
45

## 46 ANALYSIS

### 47 Clinical evaluation

48  
49 Baseline characteristics will be summarised by exposure and non-exposure to the intervention using  
50 summary statistics. PICUs will be classified as being exposed to the intervention upon completion of  
51 the training period. The primary aim is to evaluate whether there is a difference in the duration of  
52 hours on ventilation before and after exposure to the intervention. We will use survival analysis  
53 (time to extubation) and estimate a hazard ratio for the intervention effect. This means that higher  
54 hazard ratios will signify success of the intervention.  
55  
56  
57  
58  
59  
60

1  
2  
3 We will know exact survival times (i.e. times until successful extubation) for most children, but  
4 children who die on ventilation, are transferred to another unit, are not weaned before transitioning  
5 to the training phase, or are not weaned by 90 days will not have a known extubation time. We will  
6 treat such events as censored observations, making the assumption that children who are censored  
7 for any of these reasons will have an extubation time (i.e. were or would have been removed from  
8 ventilation) greater than the time until they died or were transferred. These are plausible  
9 assumptions. In order to minimise any potential within cluster contamination, we will censor  
10 children when their PICU moves into the transition phase. When the PICU moves into the  
11 intervention phase, only new admissions will be included.

12  
13 We will explore various models, but anticipate fitting a Cox proportional hazards model, perhaps  
14 with some treatment-by-covariate interaction to incorporate any non-proportionality. Allowance will  
15 be made for clustering using a frailty term for each PICU (this is similar to a random effect in a mixed  
16 effects model). We will also adjust for calendar time, since the intervention is sequentially rolled-  
17 out. If a child is re-admitted or transferred, they will be treated as new events and acknowledged  
18 within our analysis. Our primary estimate of the treatment effect will be a cluster and time adjusted  
19 hazard ratio along with 95% confidence intervals (CIs). Time adjustment is essential because this is a  
20 stepped wedge trial.

21  
22 Secondary analysis will adjust for individual and cluster level covariates (such as the adherence  
23 score) and these will be pre-specified. Null hypotheses and analyses for secondary outcomes take a  
24 similar form to that for the primary outcome. Where outcomes are not survival times, analysis will  
25 use the generalized linear mixed model, reporting risk differences for binary outcomes and mean  
26 differences for continuous outcomes (all adjusting for cluster and time effects).

27  
28 Full details of the analyses will be given in the statistical analysis plan.

### 29 30 31 32 33 34 35 36 37 38 39 40 41 42 43 44 45 46 47 **Economic evaluation**

48  
49 A cost-effectiveness analysis will be performed from the perspective of the hospital to estimate the  
50 cost per complication avoided at 28 days. The occurrence of respiratory complications at 28 days will  
51 be measured.

52  
53 We will estimate total hospital costs until 28 days for each participant by applying appropriate unit  
54 costs from the NHS Schedule of Reference Costs [17] to resource use data collected prospectively via  
55 the CRF or PICANet, as appropriate. Data on PICU resource use will be obtained via PICANet through  
56 the routine collection of the Paediatric Critical Care Minimum Data Set (PCCMDS). The PCCMDS



1  
2  
3 consists of items recorded for each PICU bed-day that can be used to define the level of care and  
4 appropriate healthcare resource group (HRG). For patients discharged from hospital before 28 days,  
5 data on any PICU readmissions within 28 days will come from PICANet but data on readmissions to  
6 general hospital wards will not be collected. This is expected to lead to only minimal data loss, as the  
7 readmission rate within 30 days in a similar paediatric population was low (5%), with a mean  
8 hospital length of stay of less than 1 day.[18]  
9

10 We will summarise hospital service use, costs and respiratory complications using descriptive  
11 statistics. Multilevel mixed-effects regression modelling will be used for total costs and respiratory  
12 complications. We will adjust for calendar time and clustering, ensuring consistency with the other  
13 models being constructed as part of the main analysis. We will estimate adjusted incremental  
14 (differential) total costs and adjusted incremental effects (respiratory complications). Standard  
15 methods will be used to explore and display uncertainty in the cost-effectiveness data including  
16 scatterplots on the cost-effectiveness plane and cost-effectiveness acceptability curves. Since there  
17 is no generally accepted threshold value for cost per respiratory complication avoided, a range of  
18 plausible thresholds will be explored. Sensitivity analysis will assess the robustness of the cost-  
19 effectiveness results to changes in key parameters. Since the time horizon of the analysis is less than  
20 1 year, it will not be necessary to discount costs and effects.  
21  
22  
23  
24  
25  
26  
27  
28  
29  
30  
31  
32  
33  
34

## 35 **PROCESS EVALUATION (PE)**

### 36 **Aim and objectives**

37 The PE will explore the processes involved in delivering the intervention. The specific objectives are:

- 38 • To establish the extent to which the intervention is implemented as intended  
39 (implementation fidelity), over time and across different PICU.
- 40 • To ascertain how PICU staff understand and respond to the intervention, over time and  
41 across different PICU.
- 42 • To explore the context over time and across different PICU and determine factors (including  
43 managerial, economic, organisational and work level) that affect implementation.  
44  
45  
46  
47  
48  
49  
50  
51  
52  
53  
54

### 55 **Data collection methods**

56 The methods used for the PE will be:  
57  
58  
59  
60

- Initial site visits to obtain information on context and usual practice collected through interviews and/or focus groups with staff involved in the implementation and delivery of the intervention, using purposive sampling to obtain a range of participants according to grade and profession.
- Telephone interviews with research staff and local champions in the intervention phase to obtain information regarding the implementation process, acceptability of the intervention, barriers and clinical decisions affecting the use of the intervention.
- Final site visits to undertake individual and/or focus group interviews with a purposive sample of staff involved in implementation or intervention delivery. Interviews will explore clinician understanding and experiences, including those relating to barriers and facilitators to the delivery and receipt of the intervention.

### **Data analysis methods**

Data from the PE will be analysed using the framework approach.[19] A sample of textual data will be reviewed and double-coded by another independent member of the research team to ensure confirmability and trustworthiness. The integration of process and trial outcome data and subsequent analyses will be secondary and explanatory, and separate from the primary effectiveness analysis. The qualitative evidence will be systematically combined with outcome data to identify the processes mediating protocol implementation, receipt and setting and observed outcomes.

### **SAMPLE SIZE**

The primary aim of this study is to determine whether the intervention can reduce the average number of hours on ventilation in eligible children. To inform the power calculation we used PICU admissions data for the years 2014 to 2016 from units participating in the trial to determine parameters to inform the sample size calculation. The expected sample size is 9520 based on an average cluster size of 28 patients per 4-week block. In this trial, duration of ventilation is censored at the point of transitioning from the control to the training period, discharge to another hospital, at 90-days, death, and receiving a tracheostomy so applying censoring to this dataset provided us with a homogeneous population that more accurately reflected the trial population. The mean duration of mechanical ventilation was 5.8 (SD 9.6) days and an ICC of 0.005 (95% CI: 0.001 to 0.01). It is postulated that a reduction of one day on ventilation is both clinically important and achievable.

1  
2  
3 Whilst our primary analysis will be a survival analysis, no methodology currently exists to determine  
4 power in a stepped wedge trial for this outcome type. We therefore determined the power available  
5 assuming a continuous outcome. This is expected to be a conservative approach meaning that it  
6 should have slightly underestimated the power not having allowed for the time to event nature of  
7 the data.  
8  
9

10  
11  
12 The cluster sample size app (<https://clusterrcts.shinyapps.io/rshinyapp>) was used to update the  
13 sample size calculation given this information. Using this app and for the actual design of the trial  
14 (using the actual information on the number of clusters and number of steps and using the following  
15 assumptions: no. clusters per sequence=1, ICC=0.005 (with consideration across the range 0.001 to  
16 0.01), an exchangeable correlation structure, mean difference=1, SD=9.6, at 5% significance level,  
17 the power is approximately 80% for a cluster size of 28 (Figure 2).  
18  
19  
20  
21  
22  
23  
24

## 25 **PATIENT AND PUBLIC INVOLVEMENT**

26  
27 We undertook consultation interviews with parents, a 15-year old PICU survivor and 13 young  
28 people who were members of the NIHR Clinical Research Network: Children, Young Person's  
29 Advisory Group about the proposed trial. Their views have contributed to the choice of patient  
30 relevant outcomes and informed the approach to consent. The consultation work was funded  
31 by the Northern Ireland Health and Social Care Research and Development Division and aided by  
32 Jenny Preston, Consumer Liaison Manager for the NIHR-Children Research Network. We secured  
33 patient and young people's continued involvement to provide advice on study design,  
34 implementation, parent and child information leaflets, assistance with preparation of educational  
35 materials and dissemination of findings. Father and son, Lewis and Archie Veale (now 18-years),  
36 agreed to be on the Trial Steering Group for this study. They have first-hand experience of the  
37 difficulties of ventilator weaning (Archie spent 8 weeks in PICU in 2014).  
38  
39  
40  
41  
42  
43  
44  
45  
46  
47

## 48 **ETHICS, OVERSIGHT AND DISSEMINATION**

### 49 **Ethics**

50  
51  
52 The Protocol (and amendments) received ethical approval from NRES Committee East Midlands -  
53 Nottingham 1 REC (17/EM/0301).  
54  
55  
56  
57  
58

### 59 **Oversight**

1  
2  
3 The Northern Ireland CTU (NICTU) will manage the trial. The Trial Management Group (TMG),  
4 chaired by the Chief Investigator, will meet monthly and have responsibility for the day-to-day  
5 operational management of the trial. The Trial Steering Committee (TSC) will meet approximately  
6 every 6 to 12 months and provide oversight for the conduct of the study on behalf of the Funder  
7 (National Institute for Health Research) and Sponsor (Queen's University Belfast). The Data  
8 Monitoring Committee (DMC) will meet approximately every 6 to 12 months, and will safeguard the  
9 rights, safety and wellbeing of trial participants; monitor data and make recommendations to the  
10 TSC on whether there are any safety reasons why the trial should not continue; and monitor overall  
11 study conduct to ensure validity and integrity of the study findings.  
12  
13  
14  
15  
16  
17  
18  
19  
20

### 21 **Dissemination**

22  
23 We will publish findings from this study in a timely and relevant manner to influence health service  
24 policy to deliver public benefit. Our dissemination strategy targets a variety of service users  
25 including: i) the UK paediatric intensive care community (trial updates at the PICS Study Group  
26 meetings); ii) the wider paediatric intensive care community (presentations at national and  
27 international meetings; publications in high quality peer-reviewed open access journals); iii) the  
28 public via a final report in the NIHR HTA journal and national parent support and liaison groups, via  
29 social media and through the PICS Families group; and iv) NHS managers and commissioners if the  
30 study supports a change of practice.  
31  
32  
33  
34  
35  
36  
37  
38  
39

### 40 **TRIAL STATUS**

41  
42 This paper presents the protocol (version 5, 12 March 2019). The trial began on 5 February 2018. At  
43 the time of first manuscript submission, data collection for the trial was ongoing and due to be  
44 complete in October 2019. The trial results will be disseminated in 2020 through presentations at  
45 national and international conferences and publication in peer reviewed medical journals.  
46  
47  
48  
49  
50

### 51 **DATA STATEMENT**

52  
53 The data generated and/or analysed during the SANDWICH trial are not yet publicly available due to  
54 the ongoing nature of the trial. When the trial is complete, datasets will be available from the chief  
55 investigator on reasonable request and arrangements will be made to deposit them in a suitable  
56 online repository.  
57  
58  
59  
60

## ACKNOWLEDGMENTS

We thank the following people for their contributions to the set-up and delivery of the SANDWICH trial: Lynn Murphy, NICTU Manager, Pauline Bradley, Data Manager, Gerard O’Hanlon Data Manager and Ruth Holman, Clinical Trial Administrator; and Dr Katherine Fielding and Professor Gavin Perkins for agreeing to chair the TSC and DMC, respectively. We thank the Paediatric Intensive Care Society – Study Group for their ongoing advice and support of this trial. We also thank the research and clinical staff from the 17 participating sites:

1. Alder Hey Children's Hospital, Liverpool
2. Royal Belfast Hospital for Sick Children, Belfast
3. Birmingham Children's Hospital, Birmingham
4. Bristol Royal Children's Hospital, Bristol
5. Royal Brompton Hospital, London
6. Addenbrooke's Hospital, Cambridge
7. Noah's Ark Children's Hospital for Wales, Cardiff
8. Great Ormond Street Hospital, London
9. Variety Children's Hospital, King's College London
10. Leeds General Infirmary, Leeds
11. Royal Victoria Infirmary, Newcastle
12. John Radcliffe Hospital, Oxford
13. Southampton General Hospital, Southampton
14. St George's Hospital, London
15. St Mary's Hospital, London
16. Royal Stoke University Hospital, Stoke-on-Trent
17. Sheffield Children's Hospital, Sheffield

## AUTHOR CONTRIBUTIONS

BB, AA, MC, KH, JJ, DM, DFMcA, CMcD, KM, MM, RB, RP, MP, LT, and TW conceived the SANDWICH trial. BB led the grant application and, as Chief Investigator, has oversight for the trial. KH and CMcD have oversight for the statistical analysis; AA has oversight for the economic analysis; LMcl and TW designed the online training materials; JJ designed and conducts the process evaluation; and RB and

1  
2  
3 MM manage the trial. BB drafted this manuscript and all authors contributed to, read and approved  
4 the final version.  
5  
6  
7  
8

### 9 **FUNDING AND SPONSORSHIP**

11 This project was funded by the National Institute for Health Research (NIHR) Health Technology  
12 Assessment (HTA) Programme (project number: HTA - 15/104/01). Queen's University Belfast is the  
13 sponsor for the trial. The views and opinions expressed therein are those of the authors and do not  
14 necessarily reflect those of the HTA Programme, NIHR, NHS, the Department of Health nor the  
15 sponsor.  
16  
17  
18  
19  
20  
21  
22

### 23 **COMPETING INTERESTS**

24 None declared.  
25  
26  
27  
28  
29

### 30 **Figure Legends**

31  
32 Figure 1. SANDWICH study flowchart  
33

34  
35 Figure 2. Power Curve  
36  
37  
38  
39

### 40 **REFERENCES**

- 41  
42 1. Paediatric Intensive Care Audit Network Annual Report 2017 (published November 2017):  
43 Universities of Leeds and Leicester. [https://www.picanet.org.uk/wp-](https://www.picanet.org.uk/wp-content/uploads/sites/25/2019/01/PICANet_2017_Annual_Report_Tables_and_Figures_FINAL_v2.0-compressed.pdf)  
44 [content/uploads/sites/25/2019/01/PICANet\\_2017\\_Annual\\_Report\\_Tables\\_and\\_Figures\\_FINAL\\_v2.0-](https://www.picanet.org.uk/wp-content/uploads/sites/25/2019/01/PICANet_2017_Annual_Report_Tables_and_Figures_FINAL_v2.0-compressed.pdf)  
45 [-compressed.pdf](https://www.picanet.org.uk/wp-content/uploads/sites/25/2019/01/PICANet_2017_Annual_Report_Tables_and_Figures_FINAL_v2.0-compressed.pdf) (Accessed 29 April 2019)  
46  
47  
48  
49 2. Blackwood B and Tume L. The implausibility of 'usual care' in an open system: sedation and  
50 weaning practices in Paediatric Intensive Care Units (PICUs) in the United Kingdom (UK). *Trials*. 2015;  
51 16: 325.  
52  
53  
54 3. Blackwood B, Junk C, Lyons J, McAuley DF and Rose L. Roles responsibilities in mechanical  
55 ventilation and weaning in pediatric intensive care units: a national survey. *Am J Crit Care*. 2013; 22:  
56 189-97.  
57  
58  
59  
60

- 1  
2  
3 4. Blackwood B, Murray M, Chisakuta A, Cardwell CR and O'Halloran P. Protocolized versus non-  
4 protocolized weaning for reducing the duration of invasive mechanical ventilation in critically ill  
5 paediatric patients. *Cochrane Database Syst Rev.* 2013; 7: CD009082.  
6  
7
- 8  
9 5. Foronda FK, Troster EJ, Farias JA, Barbas CS, Ferraro AA, Faria LS, et al. The impact of daily  
10 evaluation and spontaneous breathing test on the duration of pediatric mechanical ventilation: a  
11 randomized controlled trial. *Crit Care Med.* 2011; 39(11): 2526-33.  
12  
13
- 14 6. Jouvett PA, Payen V, Gauvin F, Emeriaud G, Lacroix J. Weaning children from mechanical  
15 ventilation with a computer-driven protocol: a pilot trial. *Intensive Care Med.* 2013; 39(5): 919-25.  
16  
17
- 18 7. Maloney C. Computerized weaning of childhood respiratory failure: University of Utah; 2007.  
19  
20
- 21 8. Curley MA, Wypij D, Watson RS, Grant MJ, Asaro LA, Cheifetz IM, et al. Protocolized sedation vs  
22 usual care in pediatric patients mechanically ventilated for acute respiratory failure: a randomized  
23 clinical trial. *JAMA.* 2015;313(4):379-89.  
24  
25
- 26 9. Blackwood B, Burns KE, Cardwell CR and O'Halloran P. Protocolized versus non-protocolized  
27 weaning for reducing the duration of mechanical ventilation in critically ill adult patients. *Cochrane*  
28 *Database Syst Rev.* 2014; 11: CD006904.  
29  
30
- 31 10. Knaus WA, Draper EA, Wagner DP and Zimmerman JE. An evaluation of outcome from intensive  
32 care in major medical centres. *Ann Intern Med.* 1986; 104: 410-8.  
33  
34
- 35 11. Wheelan S, Burchill C and Tilin F. The link between teamwork and patients' outcomes in intensive  
36 care units. *Am J Crit Care.* 2003; 12: 527-34.  
37  
38
- 39 12. Pronovost P, Needham D, Berenholtz S, et al. An intervention to decrease catheter-related  
40 bloodstream infections in the ICU. *N Engl J Med.* 2006; 355: 2725-32.  
41  
42
- 43 13. Hoffmann T, Glasziou P, Boutron I, Milne R, Perera R, Moher D, et al. Better reporting of  
44 interventions: template for intervention description and replication (TIDieR) checklist and guide.  
45 *BMJ.* 2014;348:g1687.  
46  
47
- 48 14. Weijer C, Grimshaw JM, Eccles MP, McRae AD, White A, Brehaut JC, et al. The Ottawa Statement  
49 on the Ethical Design and Conduct of Cluster Randomized Trials. *PLoS Med.* 2012; 9: e1001346.  
50  
51
- 52 15. Health Research Authority. Summary of Responses – Seeking informed consent in simple and  
53 efficient trials. 2015 [accessed 26-06-2017 from <http://www.hra.nhs.uk/consent-simple-trials/>].  
54  
55
- 56 16. Tume LN, Preston J and Blackwood B. Parents' and young people's involvement in designing a  
57 trial of ventilator weaning. *Nurs Crit Care.* 2016; 21(3): e10-8.  
58  
59  
60

1  
2  
3 17. Department of Health. NHS Reference Costs 2015–16. London: Department Of Health, London.  
4 <https://www.gov.uk/government/publications/nhs-reference-costs-2015-to-2016> (Accessed 29 April  
5 2019)  
6  
7

8  
9 18. Macrae D, Grieve R, Allen E, Sadique Z, Betts H, Morris K, Pappachan VJ, Parslow R, Tasker RC,  
10 Baines P, Broadhead M, Duthie ML, Fortune PM, Inwald D, McMaster P, Peters MJ, Schindler M,  
11 Guerriero C, Piercy D, Slavik Z, Snowdon C, Van Dyck L and Elbourne D. A clinical and economic  
12 evaluation of Control of Hyperglycaemia in Paediatric intensive care (CHiP): a randomised controlled  
13 trial. *Health Technol Assess*. 2014; 18(26): 1-210. doi: 10.3310/hta18260.  
14  
15  
16

17  
18 19. Carroll C, Patterson M, Wood S, Booth A, Rick J and Balain S. A conceptual framework for  
19 implementation fidelity. *Implement Sci: IS*. 2007;2:40.  
20  
21  
22  
23  
24  
25  
26  
27  
28  
29  
30  
31  
32  
33  
34  
35  
36  
37  
38  
39  
40  
41  
42  
43  
44  
45  
46  
47  
48  
49  
50  
51  
52  
53  
54  
55  
56  
57  
58  
59  
60



Table 1. Patient data collection schedule

|                                                                             | Baseline (at point of recruitment) | Control phase up to 90 days or PICU discharge | Intervention phase up to 90 days or PICU discharge | Post PICU discharge |
|-----------------------------------------------------------------------------|------------------------------------|-----------------------------------------------|----------------------------------------------------|---------------------|
| <b>Patient characteristics</b>                                              | √                                  |                                               |                                                    |                     |
| <b>Daily 8am ventilator parameters</b>                                      |                                    | √                                             | √                                                  |                     |
| <b>Daily PCCMD</b>                                                          |                                    | √                                             | √                                                  |                     |
| <b>Daily adverse events</b>                                                 |                                    | √                                             | √                                                  |                     |
| <b>Outcomes</b>                                                             |                                    | √                                             | √                                                  |                     |
| <b>2-hours prior to extubation, ventilator parameters and COMFORT score</b> |                                    | √                                             |                                                    |                     |
| <b>SANDWICH intervention checklist</b>                                      |                                    |                                               | √                                                  |                     |
| <b>Hospital discharge and status</b>                                        |                                    |                                               |                                                    | √                   |

*PCCMD denotes Paediatric Critical Care Minimum Dataset*

1  
2  
3  
4  
5  
6  
7  
8  
9  
10  
11  
12  
13  
14  
15  
16  
17  
18  
19  
20  
21  
22  
23  
24  
25  
26  
27  
28  
29  
30  
31  
32  
33  
34  
35  
36  
37  
38  
39  
40  
41  
42  
43  
44  
45  
46  
47  
48  
49  
50  
51  
52  
53  
54  
55  
56  
57  
58  
59  
60

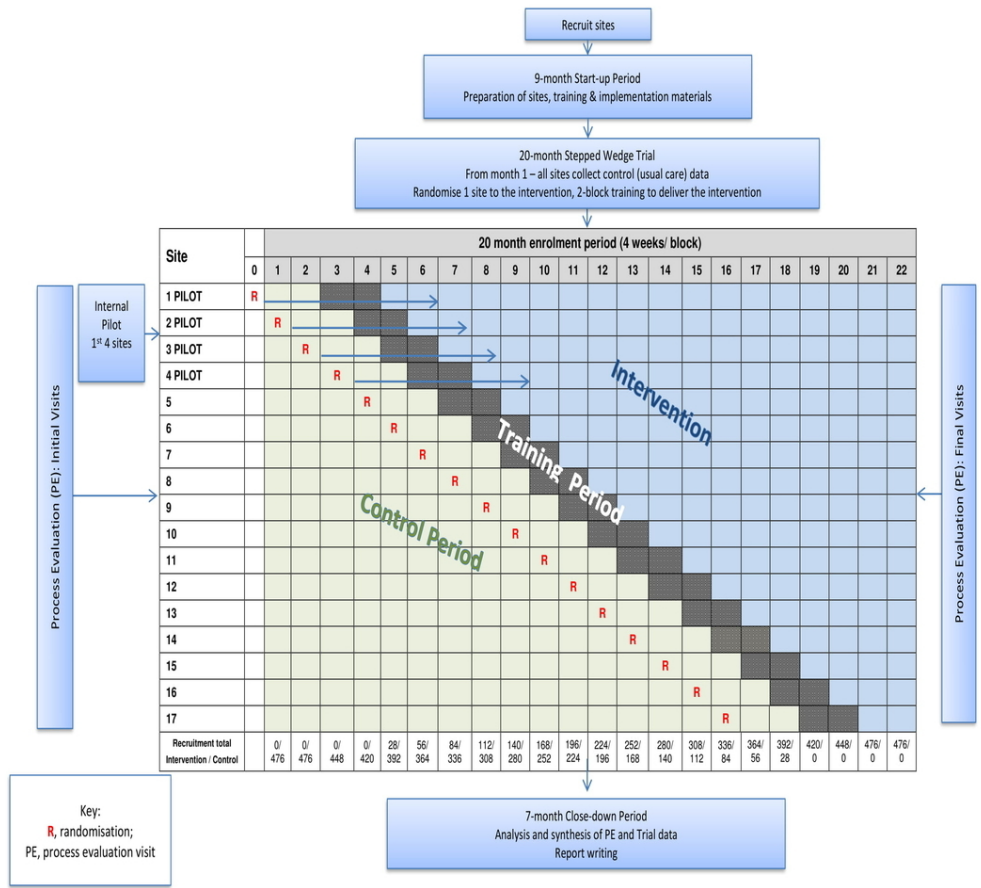

Figure 1 Study Flowchart

90x90mm (300 x 300 DPI)

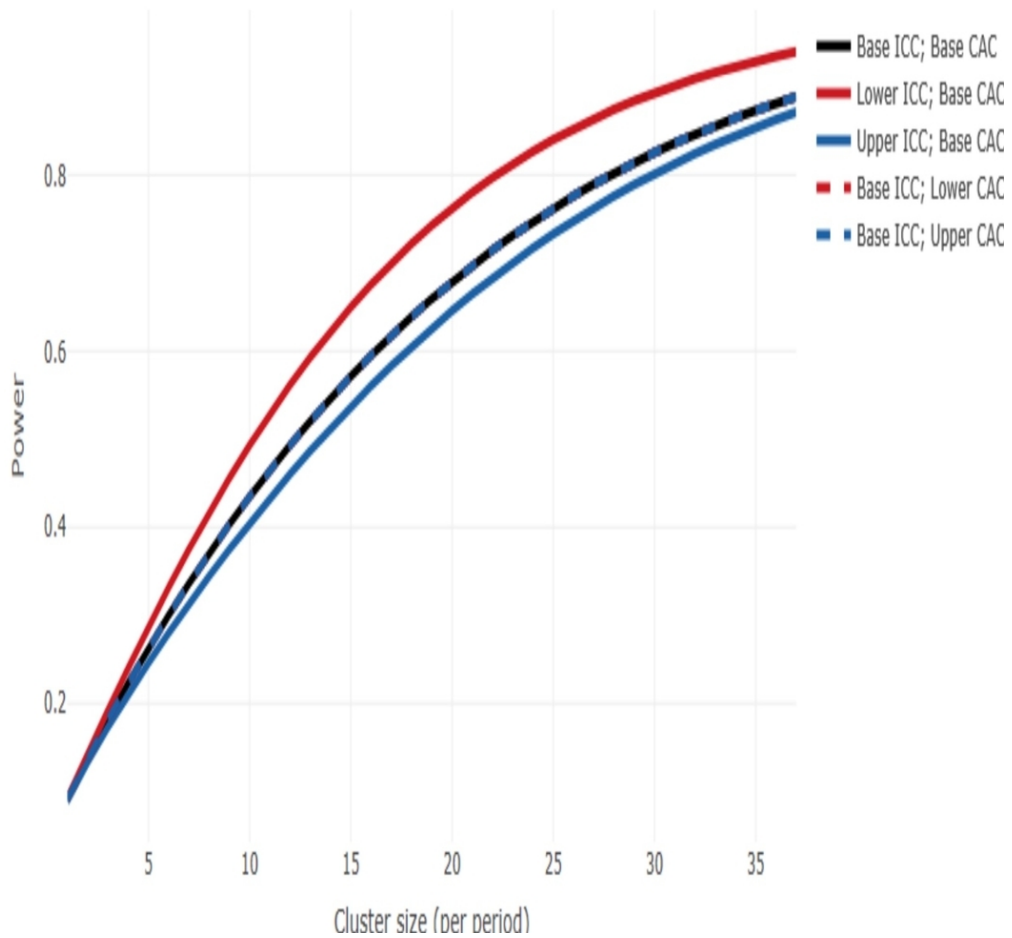

Figure 2 Power Curve

88x88mm (300 x 300 DPI)

# Reporting checklist for protocol of a clinical trial.

Based on the SPIRIT guidelines.

## Instructions to authors

Complete this checklist by entering the page numbers from your manuscript where readers will find each of the items listed below.

Your article may not currently address all the items on the checklist. Please modify your text to include the missing information. If you are certain that an item does not apply, please write "n/a" and provide a short explanation.

Upload your completed checklist as an extra file when you submit to a journal.

In your methods section, say that you used the SPIRIT reporting guidelines, and cite them as:

Chan A-W, Tetzlaff JM, Altman DG, Laupacis A, Gøtzsche PC, Krleža-Jerić K, Hróbjartsson A, Mann H, Dickersin K, Berlin J, Doré C, Parulekar W, Summerskill W, Groves T, Schulz K, Sox H, Rockhold FW, Rennie D, Moher D. SPIRIT 2013 Statement: Defining standard protocol items for clinical trials. *Ann Intern Med.* 2013;158(3):200-207

|                                   |                     | Reporting Item                                                                                               | Page Number |
|-----------------------------------|---------------------|--------------------------------------------------------------------------------------------------------------|-------------|
| <b>Administrative information</b> |                     |                                                                                                              |             |
| Title                             | <a href="#">#1</a>  | Descriptive title identifying the study design, population, interventions, and, if applicable, trial acronym | 1           |
| Trial registration                | <a href="#">#2a</a> | Trial identifier and registry name. If not yet registered, name of intended registry                         | 3           |
| Trial registration: data set      | <a href="#">#2b</a> | All items from the World Health Organization Trial Registration Data Set                                     | -           |
| Protocol version                  | <a href="#">#3</a>  | Date and version identifier                                                                                  | 11          |
| Funding                           | <a href="#">#4</a>  | Sources and types of financial, material, and other support                                                  | 12          |

|    |                      |                     |                                                          |     |
|----|----------------------|---------------------|----------------------------------------------------------|-----|
| 1  | Roles and            | <a href="#">#5a</a> | Names, affiliations, and roles of protocol contributors  | 12  |
| 2  | responsibilities:    |                     |                                                          |     |
| 3  | contributorship      |                     |                                                          |     |
| 4  |                      |                     |                                                          |     |
| 5  |                      |                     |                                                          |     |
| 6  | Roles and            | <a href="#">#5b</a> | Name and contact information for the trial sponsor       | 12  |
| 7  | responsibilities:    |                     |                                                          |     |
| 8  | sponsor contact      |                     |                                                          |     |
| 9  | information          |                     |                                                          |     |
| 10 |                      |                     |                                                          |     |
| 11 |                      |                     |                                                          |     |
| 12 |                      |                     |                                                          |     |
| 13 | Roles and            | <a href="#">#5c</a> | Role of study sponsor and funders, if any, in study      | 12  |
| 14 | responsibilities:    |                     | design; collection, management, analysis, and            |     |
| 15 | sponsor and funder   |                     | interpretation of data; writing of the report; and the   |     |
| 16 |                      |                     | decision to submit the report for publication, including |     |
| 17 |                      |                     | whether they will have ultimate authority over any of    |     |
| 18 |                      |                     | these activities                                         |     |
| 19 |                      |                     |                                                          |     |
| 20 |                      |                     |                                                          |     |
| 21 |                      |                     |                                                          |     |
| 22 |                      |                     |                                                          |     |
| 23 | Roles and            | <a href="#">#5d</a> | Composition, roles, and responsibilities of the          | 11  |
| 24 | responsibilities:    |                     | coordinating centre, steering committee, endpoint        |     |
| 25 | committees           |                     | adjudication committee, data management team, and        |     |
| 26 |                      |                     | other individuals or groups overseeing the trial, if     |     |
| 27 |                      |                     | applicable (see Item 21a for data monitoring committee)  |     |
| 28 |                      |                     |                                                          |     |
| 29 |                      |                     |                                                          |     |
| 30 |                      |                     |                                                          |     |
| 31 | <b>Introduction</b>  |                     |                                                          |     |
| 32 |                      |                     |                                                          |     |
| 33 | Background and       | <a href="#">#6a</a> | Description of research question and justification for   | 3-4 |
| 34 | rationale            |                     | undertaking the trial, including summary of relevant     |     |
| 35 |                      |                     | studies (published and unpublished) examining benefits   |     |
| 36 |                      |                     | and harms for each intervention                          |     |
| 37 |                      |                     |                                                          |     |
| 38 |                      |                     |                                                          |     |
| 39 |                      |                     |                                                          |     |
| 40 | Background and       | <a href="#">#6b</a> | Explanation for choice of comparators                    | 3-4 |
| 41 | rationale: choice of |                     |                                                          |     |
| 42 | comparators          |                     |                                                          |     |
| 43 |                      |                     |                                                          |     |
| 44 |                      |                     |                                                          |     |
| 45 | Objectives           | <a href="#">#7</a>  | Specific objectives or hypotheses                        | 4   |
| 46 |                      |                     |                                                          |     |
| 47 |                      |                     |                                                          |     |
| 48 | Trial design         | <a href="#">#8</a>  | Description of trial design including type of trial (eg, | 5   |
| 49 |                      |                     | parallel group, crossover, factorial, single group),     |     |
| 50 |                      |                     | allocation ratio, and framework (eg, superiority,        |     |
| 51 |                      |                     | equivalence, non-inferiority, exploratory)               |     |
| 52 |                      |                     |                                                          |     |
| 53 |                      |                     |                                                          |     |
| 54 |                      |                     |                                                          |     |

**Methods:**  
**Participants,**

## interventions, and outcomes

|    |                                 |                      |                                                                                                                                                                                                                                                                                                                                                                                |      |
|----|---------------------------------|----------------------|--------------------------------------------------------------------------------------------------------------------------------------------------------------------------------------------------------------------------------------------------------------------------------------------------------------------------------------------------------------------------------|------|
| 1  |                                 |                      |                                                                                                                                                                                                                                                                                                                                                                                |      |
| 2  |                                 |                      |                                                                                                                                                                                                                                                                                                                                                                                |      |
| 3  |                                 |                      |                                                                                                                                                                                                                                                                                                                                                                                |      |
| 4  | Study setting                   | <a href="#">#9</a>   | Description of study settings (eg, community clinic, academic hospital) and list of countries where data will be collected. Reference to where list of study sites can be obtained                                                                                                                                                                                             | 5    |
| 5  |                                 |                      |                                                                                                                                                                                                                                                                                                                                                                                |      |
| 6  |                                 |                      |                                                                                                                                                                                                                                                                                                                                                                                |      |
| 7  |                                 |                      |                                                                                                                                                                                                                                                                                                                                                                                |      |
| 8  |                                 |                      |                                                                                                                                                                                                                                                                                                                                                                                |      |
| 9  |                                 |                      |                                                                                                                                                                                                                                                                                                                                                                                |      |
| 10 |                                 |                      |                                                                                                                                                                                                                                                                                                                                                                                |      |
| 11 | Eligibility criteria            | <a href="#">#10</a>  | Inclusion and exclusion criteria for participants. If applicable, eligibility criteria for study centres and individuals who will perform the interventions (eg, surgeons, psychotherapists)                                                                                                                                                                                   | 6    |
| 12 |                                 |                      |                                                                                                                                                                                                                                                                                                                                                                                |      |
| 13 |                                 |                      |                                                                                                                                                                                                                                                                                                                                                                                |      |
| 14 |                                 |                      |                                                                                                                                                                                                                                                                                                                                                                                |      |
| 15 |                                 |                      |                                                                                                                                                                                                                                                                                                                                                                                |      |
| 16 |                                 |                      |                                                                                                                                                                                                                                                                                                                                                                                |      |
| 17 | Interventions: description      | <a href="#">#11a</a> | Interventions for each group with sufficient detail to allow replication, including how and when they will be administered                                                                                                                                                                                                                                                     | 6    |
| 18 |                                 |                      |                                                                                                                                                                                                                                                                                                                                                                                |      |
| 19 |                                 |                      |                                                                                                                                                                                                                                                                                                                                                                                |      |
| 20 |                                 |                      |                                                                                                                                                                                                                                                                                                                                                                                |      |
| 21 |                                 |                      |                                                                                                                                                                                                                                                                                                                                                                                |      |
| 22 |                                 |                      |                                                                                                                                                                                                                                                                                                                                                                                |      |
| 23 | Interventions: modifications    | <a href="#">#11b</a> | Criteria for discontinuing or modifying allocated interventions for a given trial participant (eg, drug dose change in response to harms, participant request, or improving / worsening disease)                                                                                                                                                                               | N/A  |
| 24 |                                 |                      |                                                                                                                                                                                                                                                                                                                                                                                |      |
| 25 |                                 |                      |                                                                                                                                                                                                                                                                                                                                                                                |      |
| 26 |                                 |                      |                                                                                                                                                                                                                                                                                                                                                                                |      |
| 27 |                                 |                      |                                                                                                                                                                                                                                                                                                                                                                                |      |
| 28 |                                 |                      |                                                                                                                                                                                                                                                                                                                                                                                |      |
| 29 |                                 |                      |                                                                                                                                                                                                                                                                                                                                                                                |      |
| 30 | Interventions: adherence        | <a href="#">#11c</a> | Strategies to improve adherence to intervention protocols, and any procedures for monitoring adherence (eg, drug tablet return; laboratory tests)                                                                                                                                                                                                                              | 9-10 |
| 31 |                                 |                      |                                                                                                                                                                                                                                                                                                                                                                                |      |
| 32 |                                 |                      |                                                                                                                                                                                                                                                                                                                                                                                |      |
| 33 |                                 |                      |                                                                                                                                                                                                                                                                                                                                                                                |      |
| 34 |                                 |                      |                                                                                                                                                                                                                                                                                                                                                                                |      |
| 35 | Interventions: concomitant care | <a href="#">#11d</a> | Relevant concomitant care and interventions that are permitted or prohibited during the trial                                                                                                                                                                                                                                                                                  | N/A  |
| 36 |                                 |                      |                                                                                                                                                                                                                                                                                                                                                                                |      |
| 37 |                                 |                      |                                                                                                                                                                                                                                                                                                                                                                                |      |
| 38 |                                 |                      |                                                                                                                                                                                                                                                                                                                                                                                |      |
| 39 | Outcomes                        | <a href="#">#12</a>  | Primary, secondary, and other outcomes, including the specific measurement variable (eg, systolic blood pressure), analysis metric (eg, change from baseline, final value, time to event), method of aggregation (eg, median, proportion), and time point for each outcome. Explanation of the clinical relevance of chosen efficacy and harm outcomes is strongly recommended | 7    |
| 40 |                                 |                      |                                                                                                                                                                                                                                                                                                                                                                                |      |
| 41 |                                 |                      |                                                                                                                                                                                                                                                                                                                                                                                |      |
| 42 |                                 |                      |                                                                                                                                                                                                                                                                                                                                                                                |      |
| 43 |                                 |                      |                                                                                                                                                                                                                                                                                                                                                                                |      |
| 44 |                                 |                      |                                                                                                                                                                                                                                                                                                                                                                                |      |
| 45 |                                 |                      |                                                                                                                                                                                                                                                                                                                                                                                |      |
| 46 |                                 |                      |                                                                                                                                                                                                                                                                                                                                                                                |      |
| 47 |                                 |                      |                                                                                                                                                                                                                                                                                                                                                                                |      |
| 48 |                                 |                      |                                                                                                                                                                                                                                                                                                                                                                                |      |
| 49 |                                 |                      |                                                                                                                                                                                                                                                                                                                                                                                |      |
| 50 | Participant timeline            | <a href="#">#13</a>  | Time schedule of enrolment, interventions (including any run-ins and washouts), assessments, and visits for participants. A schematic diagram is highly recommended (see Figure)                                                                                                                                                                                               | 8    |
| 51 |                                 |                      |                                                                                                                                                                                                                                                                                                                                                                                |      |
| 52 |                                 |                      |                                                                                                                                                                                                                                                                                                                                                                                |      |
| 53 |                                 |                      |                                                                                                                                                                                                                                                                                                                                                                                |      |
| 54 |                                 |                      |                                                                                                                                                                                                                                                                                                                                                                                |      |
| 55 |                                 |                      |                                                                                                                                                                                                                                                                                                                                                                                |      |
| 56 |                                 |                      |                                                                                                                                                                                                                                                                                                                                                                                |      |
| 57 | Sample size                     | <a href="#">#14</a>  | Estimated number of participants needed to achieve study objectives and how it was determined, including                                                                                                                                                                                                                                                                       | 10   |
| 58 |                                 |                      |                                                                                                                                                                                                                                                                                                                                                                                |      |
| 59 |                                 |                      |                                                                                                                                                                                                                                                                                                                                                                                |      |
| 60 |                                 |                      |                                                                                                                                                                                                                                                                                                                                                                                |      |

clinical and statistical assumptions supporting any sample size calculations

Recruitment [#15](#) Strategies for achieving adequate participant enrolment to reach target sample size 6

## Methods:

### Assignment of interventions (for controlled trials)

Allocation: sequence generation [#16a](#) Method of generating the allocation sequence (eg, computer-generated random numbers), and list of any factors for stratification. To reduce predictability of a random sequence, details of any planned restriction (eg, blocking) should be provided in a separate document that is unavailable to those who enrol participants or assign interventions 5

Allocation concealment mechanism [#16b](#) Mechanism of implementing the allocation sequence (eg, central telephone; sequentially numbered, opaque, sealed envelopes), describing any steps to conceal the sequence until interventions are assigned 5

Allocation: implementation [#16c](#) Who will generate the allocation sequence, who will enrol participants, and who will assign participants to interventions 5

Blinding (masking) [#17a](#) Who will be blinded after assignment to interventions (eg, trial participants, care providers, outcome assessors, data analysts), and how N/A

Blinding (masking): emergency unblinding [#17b](#) If blinded, circumstances under which unblinding is permissible, and procedure for revealing a participant's allocated intervention during the trial N/A

### Methods: Data collection, management, and analysis

Data collection plan [#18a](#) Plans for assessment and collection of outcome, baseline, and other trial data, including any related processes to promote data quality (eg, duplicate 7-8

measurements, training of assessors) and a description of study instruments (eg, questionnaires, laboratory tests) along with their reliability and validity, if known. Reference to where data collection forms can be found, if not in the protocol

|    |                            |                      |                                                             |
|----|----------------------------|----------------------|-------------------------------------------------------------|
| 1  |                            |                      |                                                             |
| 2  |                            |                      |                                                             |
| 3  |                            |                      |                                                             |
| 4  |                            |                      |                                                             |
| 5  |                            |                      |                                                             |
| 6  |                            |                      |                                                             |
| 7  |                            |                      |                                                             |
| 8  |                            |                      |                                                             |
| 9  | Data collection plan:      | <a href="#">#18b</a> | Plans to promote participant retention and complete         |
| 10 | retention                  |                      | follow-up, including list of any outcome data to be         |
| 11 |                            |                      | collected for participants who discontinue or deviate from  |
| 12 |                            |                      | intervention protocols                                      |
| 13 |                            |                      |                                                             |
| 14 |                            |                      |                                                             |
| 15 | Data management            | <a href="#">#19</a>  | Plans for data entry, coding, security, and storage,        |
| 16 |                            |                      | including any related processes to promote data quality     |
| 17 |                            |                      | (eg, double data entry; range checks for data values).      |
| 18 |                            |                      | Reference to where details of data management               |
| 19 |                            |                      | procedures can be found, if not in the protocol             |
| 20 |                            |                      |                                                             |
| 21 |                            |                      |                                                             |
| 22 |                            |                      |                                                             |
| 23 | Statistics: outcomes       | <a href="#">#20a</a> | Statistical methods for analysing primary and secondary     |
| 24 |                            |                      | outcomes. Reference to where other details of the           |
| 25 |                            |                      | statistical analysis plan can be found, if not in the       |
| 26 |                            |                      | protocol                                                    |
| 27 |                            |                      |                                                             |
| 28 |                            |                      |                                                             |
| 29 |                            |                      |                                                             |
| 30 | Statistics: additional     | <a href="#">#20b</a> | Methods for any additional analyses (eg, subgroup and       |
| 31 | analyses                   |                      | adjusted analyses)                                          |
| 32 |                            |                      |                                                             |
| 33 |                            |                      |                                                             |
| 34 | Statistics: analysis       | <a href="#">#20c</a> | Definition of analysis population relating to protocol non- |
| 35 | population and             |                      | adherence (eg, as randomised analysis), and any             |
| 36 | missing data               |                      | statistical methods to handle missing data (eg, multiple    |
| 37 |                            |                      | imputation)                                                 |
| 38 |                            |                      |                                                             |
| 39 |                            |                      |                                                             |
| 40 |                            |                      |                                                             |
| 41 | <b>Methods: Monitoring</b> |                      |                                                             |
| 42 |                            |                      |                                                             |
| 43 | Data monitoring:           | <a href="#">#21a</a> | Composition of data monitoring committee (DMC);             |
| 44 | formal committee           |                      | summary of its role and reporting structure; statement of   |
| 45 |                            |                      | whether it is independent from the sponsor and              |
| 46 |                            |                      | competing interests; and reference to where further         |
| 47 |                            |                      | details about its charter can be found, if not in the       |
| 48 |                            |                      | protocol. Alternatively, an explanation of why a DMC is     |
| 49 |                            |                      | not needed                                                  |
| 50 |                            |                      |                                                             |
| 51 |                            |                      |                                                             |
| 52 |                            |                      |                                                             |
| 53 |                            |                      |                                                             |
| 54 | Data monitoring:           | <a href="#">#21b</a> | Description of any interim analyses and stopping            |
| 55 | interim analysis           |                      | guidelines, including who will have access to these         |
| 56 |                            |                      |                                                             |
| 57 |                            |                      |                                                             |
| 58 |                            |                      |                                                             |
| 59 |                            |                      |                                                             |
| 60 |                            |                      |                                                             |



interim results and make the final decision to terminate the trial

|    |                                      |                      |                                                                                                                                                                                                                                    |
|----|--------------------------------------|----------------------|------------------------------------------------------------------------------------------------------------------------------------------------------------------------------------------------------------------------------------|
| 1  |                                      |                      |                                                                                                                                                                                                                                    |
| 2  |                                      |                      |                                                                                                                                                                                                                                    |
| 3  |                                      |                      |                                                                                                                                                                                                                                    |
| 4  | Harms                                | <a href="#">#22</a>  | Plans for collecting, assessing, reporting, and managing solicited and spontaneously reported adverse events and other unintended effects of trial interventions or trial conduct                                                  |
| 5  |                                      |                      |                                                                                                                                                                                                                                    |
| 6  |                                      |                      |                                                                                                                                                                                                                                    |
| 7  |                                      |                      |                                                                                                                                                                                                                                    |
| 8  |                                      |                      |                                                                                                                                                                                                                                    |
| 9  |                                      |                      |                                                                                                                                                                                                                                    |
| 10 |                                      |                      |                                                                                                                                                                                                                                    |
| 11 | Auditing                             | <a href="#">#23</a>  | Frequency and procedures for auditing trial conduct, if any, and whether the process will be independent from investigators and the sponsor                                                                                        |
| 12 |                                      |                      |                                                                                                                                                                                                                                    |
| 13 |                                      |                      |                                                                                                                                                                                                                                    |
| 14 |                                      |                      |                                                                                                                                                                                                                                    |
| 15 |                                      |                      |                                                                                                                                                                                                                                    |
| 16 | <b>Ethics and dissemination</b>      |                      |                                                                                                                                                                                                                                    |
| 17 |                                      |                      |                                                                                                                                                                                                                                    |
| 18 |                                      |                      |                                                                                                                                                                                                                                    |
| 19 |                                      |                      |                                                                                                                                                                                                                                    |
| 20 | Research ethics approval             | <a href="#">#24</a>  | Plans for seeking research ethics committee / institutional review board (REC / IRB) approval                                                                                                                                      |
| 21 |                                      |                      |                                                                                                                                                                                                                                    |
| 22 |                                      |                      |                                                                                                                                                                                                                                    |
| 23 |                                      |                      |                                                                                                                                                                                                                                    |
| 24 | Protocol amendments                  | <a href="#">#25</a>  | Plans for communicating important protocol modifications (eg, changes to eligibility criteria, outcomes, analyses) to relevant parties (eg, investigators, REC / IRBs, trial participants, trial registries, journals, regulators) |
| 25 |                                      |                      |                                                                                                                                                                                                                                    |
| 26 |                                      |                      |                                                                                                                                                                                                                                    |
| 27 |                                      |                      |                                                                                                                                                                                                                                    |
| 28 |                                      |                      |                                                                                                                                                                                                                                    |
| 29 |                                      |                      |                                                                                                                                                                                                                                    |
| 30 |                                      |                      |                                                                                                                                                                                                                                    |
| 31 |                                      |                      |                                                                                                                                                                                                                                    |
| 32 | Consent or assent                    | <a href="#">#26a</a> | Who will obtain informed consent or assent from potential trial participants or authorised surrogates, and how (see Item 32)                                                                                                       |
| 33 |                                      |                      |                                                                                                                                                                                                                                    |
| 34 |                                      |                      |                                                                                                                                                                                                                                    |
| 35 |                                      |                      |                                                                                                                                                                                                                                    |
| 36 |                                      |                      |                                                                                                                                                                                                                                    |
| 37 | Consent or assent: ancillary studies | <a href="#">#26b</a> | Additional consent provisions for collection and use of participant data and biological specimens in ancillary studies, if applicable                                                                                              |
| 38 |                                      |                      |                                                                                                                                                                                                                                    |
| 39 |                                      |                      |                                                                                                                                                                                                                                    |
| 40 |                                      |                      |                                                                                                                                                                                                                                    |
| 41 |                                      |                      |                                                                                                                                                                                                                                    |
| 42 |                                      |                      |                                                                                                                                                                                                                                    |
| 43 | Confidentiality                      | <a href="#">#27</a>  | How personal information about potential and enrolled participants will be collected, shared, and maintained in order to protect confidentiality before, during, and after the trial                                               |
| 44 |                                      |                      |                                                                                                                                                                                                                                    |
| 45 |                                      |                      |                                                                                                                                                                                                                                    |
| 46 |                                      |                      |                                                                                                                                                                                                                                    |
| 47 |                                      |                      |                                                                                                                                                                                                                                    |
| 48 |                                      |                      |                                                                                                                                                                                                                                    |
| 49 | Declaration of interests             | <a href="#">#28</a>  | Financial and other competing interests for principal investigators for the overall trial and each study site                                                                                                                      |
| 50 |                                      |                      |                                                                                                                                                                                                                                    |
| 51 |                                      |                      |                                                                                                                                                                                                                                    |
| 52 |                                      |                      |                                                                                                                                                                                                                                    |
| 53 | Data access                          | <a href="#">#29</a>  | Statement of who will have access to the final trial dataset, and disclosure of contractual agreements that limit such access for investigators                                                                                    |
| 54 |                                      |                      |                                                                                                                                                                                                                                    |
| 55 |                                      |                      |                                                                                                                                                                                                                                    |
| 56 |                                      |                      |                                                                                                                                                                                                                                    |
| 57 |                                      |                      |                                                                                                                                                                                                                                    |
| 58 |                                      |                      |                                                                                                                                                                                                                                    |
| 59 |                                      |                      |                                                                                                                                                                                                                                    |
| 60 |                                      |                      |                                                                                                                                                                                                                                    |

|    |                          |                      |                                                                |     |
|----|--------------------------|----------------------|----------------------------------------------------------------|-----|
| 1  | Ancillary and post trial | <a href="#">#30</a>  | Provisions, if any, for ancillary and post-trial care, and for | N/A |
| 2  | care                     |                      | compensation to those who suffer harm from trial               |     |
| 3  |                          |                      | participation                                                  |     |
| 4  |                          |                      |                                                                |     |
| 5  |                          |                      |                                                                |     |
| 6  | Dissemination policy:    | <a href="#">#31a</a> | Plans for investigators and sponsor to communicate trial       | 11  |
| 7  | trial results            |                      | results to participants, healthcare professionals, the         |     |
| 8  |                          |                      | public, and other relevant groups (eg, via publication,        |     |
| 9  |                          |                      | reporting in results databases, or other data sharing          |     |
| 10 |                          |                      | arrangements), including any publication restrictions          |     |
| 11 |                          |                      |                                                                |     |
| 12 |                          |                      |                                                                |     |
| 13 |                          |                      |                                                                |     |
| 14 | Dissemination policy:    | <a href="#">#31b</a> | Authorship eligibility guidelines and any intended use of      | 11  |
| 15 | authorship               |                      | professional writers                                           |     |
| 16 |                          |                      |                                                                |     |
| 17 |                          |                      |                                                                |     |
| 18 | Dissemination policy:    | <a href="#">#31c</a> | Plans, if any, for granting public access to the full          | 11  |
| 19 | reproducible research    |                      | protocol, participant-level dataset, and statistical code      |     |
| 20 |                          |                      |                                                                |     |
| 21 |                          |                      |                                                                |     |
| 22 | <b>Appendices</b>        |                      |                                                                |     |
| 23 |                          |                      |                                                                |     |
| 24 | Informed consent         | <a href="#">#32</a>  | Model consent form and other related documentation             | N/A |
| 25 | materials                |                      | given to participants and authorised surrogates                |     |
| 26 |                          |                      |                                                                |     |
| 27 |                          |                      |                                                                |     |
| 28 | Biological specimens     | <a href="#">#33</a>  | Plans for collection, laboratory evaluation, and storage of    | N/A |
| 29 |                          |                      | biological specimens for genetic or molecular analysis in      |     |
| 30 |                          |                      | the current trial and for future use in ancillary studies, if  |     |
| 31 |                          |                      | applicable                                                     |     |
| 32 |                          |                      |                                                                |     |
| 33 |                          |                      |                                                                |     |
| 34 |                          |                      |                                                                |     |

35 None The SPIRIT checklist is distributed under the terms of the Creative Commons Attribution  
 36 License CC-BY-ND 3.0. This checklist can be completed online using <https://www.goodreports.org/>, a  
 37 tool made by the [EQUATOR Network](#) in collaboration with [Penelope.ai](#)  
 38  
 39  
 40  
 41  
 42  
 43  
 44  
 45  
 46  
 47  
 48  
 49  
 50  
 51  
 52  
 53  
 54  
 55  
 56  
 57  
 58  
 59  
 60
